# Supplementary material for: Indigofera suffruticosa aerial parts extract induce G2/M arrest and ATR/CHK1 pathway in Jurkat cells
Source: PubMed Central journal article supplement (PMC10775588; doi:10.1186/s12906-023-04325-w), 2024-01-09

Supplementary materials for

***Indigofera suffruticosa* aerial parts extract induces ATR/CHK1 pathway and G2/M arrest in Jurkat cells**

Hong-Loan Tran, Kuei-Hung Lai, Hsun-Shuo Chang, Yi-Siao Chen, Hui-Chun Wang, Shuen-Shin Yang, Hsueh-Wei Chang, Chin-Mu Hsu, Chia-Hung Yen\*, and Hui-Hua Hsiao\*

Content:

Supplementary Table S1.

Supplementary Fig. S1.

Supplementary Fig. S2.

Supplementary Fig. S3.

Supplementary Fig. S4.

Original images of western blot

Multiple exposure images of western blot

Supplementary Table S1: Antibodies used in this study

| Targets                                                       | Vendors        | Catalogy No. |
|---------------------------------------------------------------|----------------|--------------|
| p-CDC25 (S216)                                                | Cell signaling | 9528         |
| p-CHK1 (S345)                                                 | Cell signaling | 2348         |
| CHK1                                                          | BETHYL         | 800-338-9579 |
| p-CHK2 (T68)                                                  | Cell signaling | 2197         |
| CHK2                                                          | Cell signaling | 3440         |
| p-ATR (S428)                                                  | Cell signaling | 2853         |
| p-ATR (T1989)                                                 | GeneTex        | 41354        |
| ATR                                                           | Abnova         | PAB9924      |
| p-ATM (T1981)                                                 | EPITOMIC       | YH101212D    |
| ATM                                                           | Gene Tex       | GTX70103     |
| p-CDK1 (Y15)                                                  | Cell signaling | 4539         |
| p-CDK1 (T161)                                                 | Cell signaling | 9114         |
| CDK1                                                          | Cell signaling | 77055        |
| p-Wee1 (S642)                                                 | Cell signaling | 4910         |
| Wee1                                                          | Cell signaling | 13084        |
| Cyclin A                                                      | Cell signaling | 4656         |
| Cyclin B1                                                     | Cell signaling | 12231        |
| Cyclin E2                                                     | Cell signaling | 4132         |
| p-H2A.X (S139)                                                | MILLPORE       | 05-636       |
| Anti-rabbit IgG, HRP-linked Antibody                          | Cell signaling | 7074         |
| Anti-mouse IgG, HRP-linked Antibody                           | Cell signaling | 7076         |
| Goat anti-Mouse IgG (H+L) Secondary Antibody, Alexa Fluor 594 | Invitrogen     | R37121       |

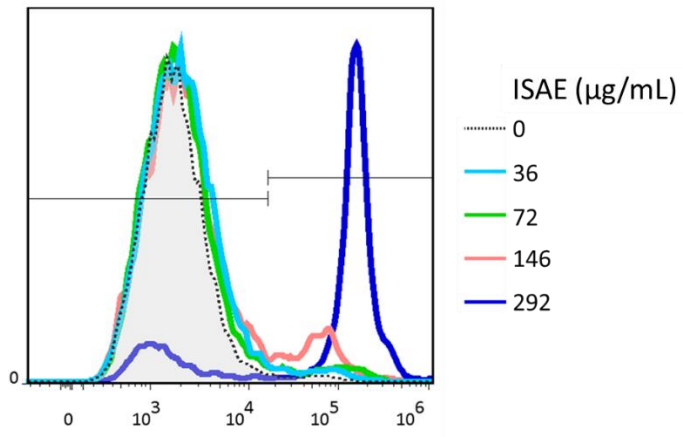

Supplementary Fig. S1. Representative plot of Annexin V staining results. This figure is related to Fig. 2D.

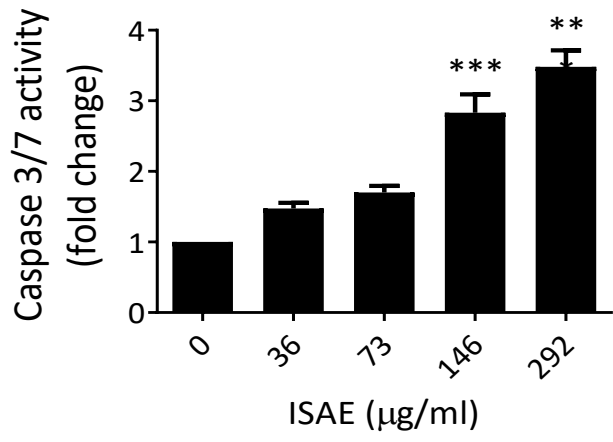

Supplementary Fig. S2. The caspase-3/7 activities in Jurkat cells after 12 hours of ISAE treatment were assessed by Caspase-Glo® 3/7 assay (Promega) according to the manufacturer's instructions. The graph was expressed as fold changes to control group.

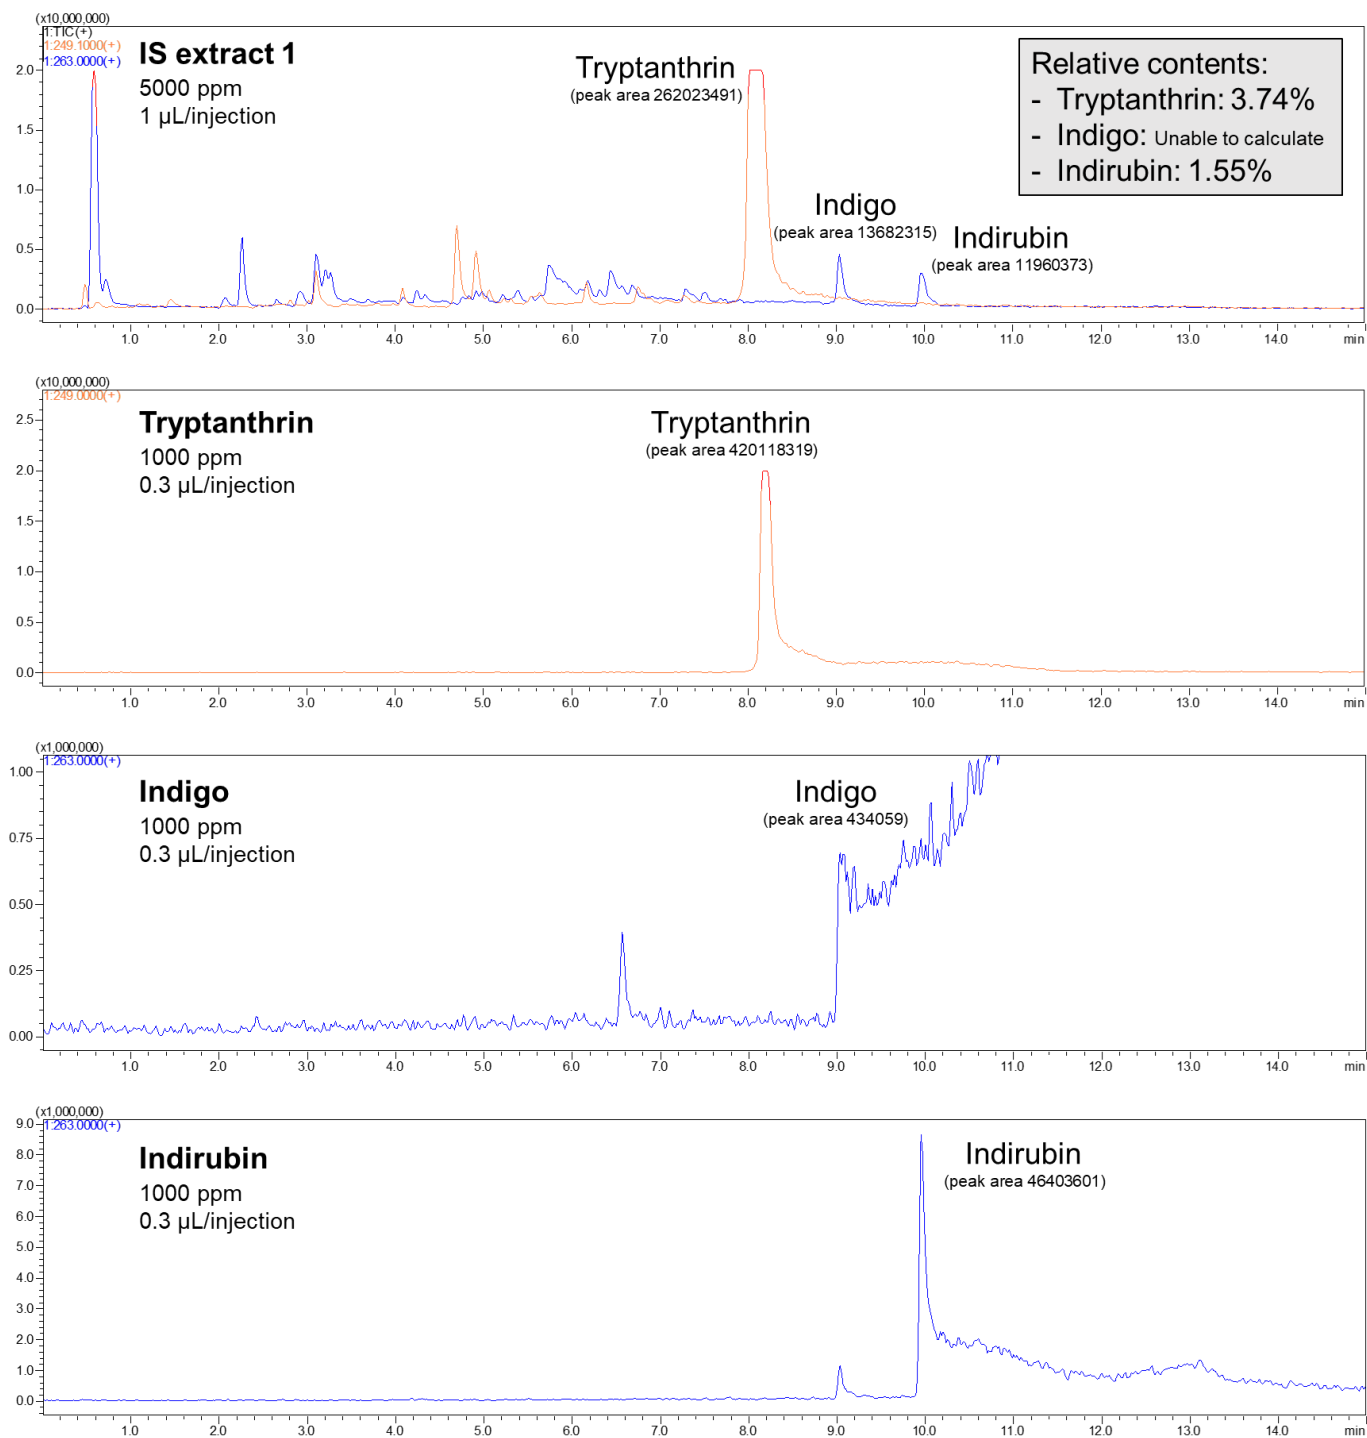

Supplementary Fig. S3. Relative quantitative analysis of tryptanthrin, indigo, and indirubin in ISAE. The selected ion current chromatograms of the ISAE extract, tryptanthrin, indigo, and indirubin were carried out through MS full scan experiment in positive mode. The relative abundance of the three selected compounds in ISAE extract were calculated based on comparing the peak area ratios with standard compounds.

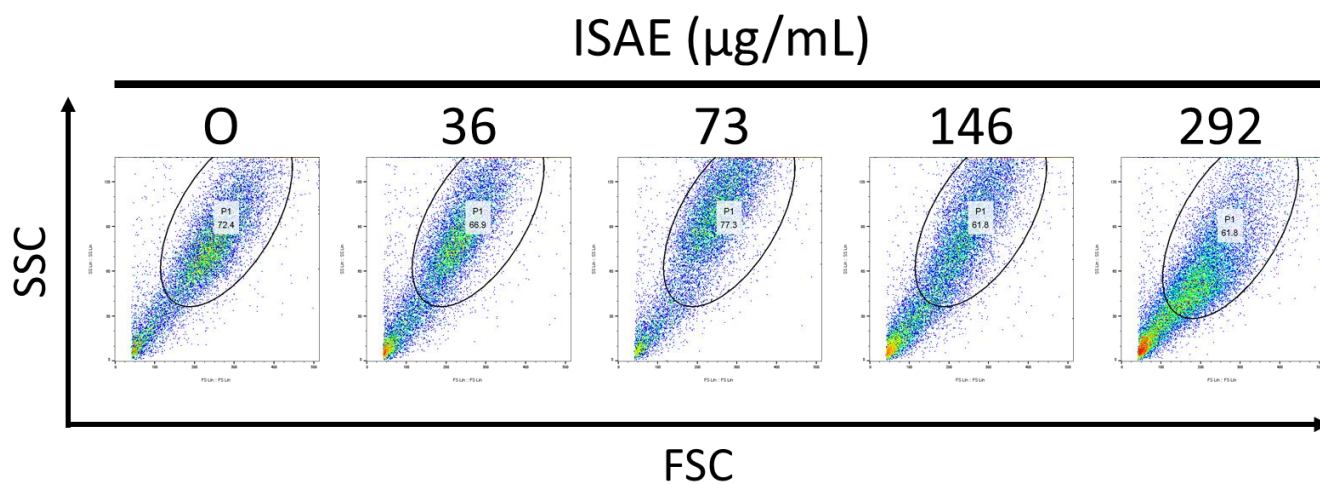

Supplementary Fig. S4. Cell gating for cell cycle analysis. For cell cycle analysis, cells were gated using forward scatter (FSC) and side scatter (SSC) properties. This helped in excluding cell debris and selecting the desired cells (within the black circle) for analysis. The gating area was established based on the solvent control group (0  $\mu\text{g/mL}$  of ISAE) and was consistently applied to all other groups. This illustration corresponds to Fig. 2A.

# Original images of western blot

Figure 3A-left panel

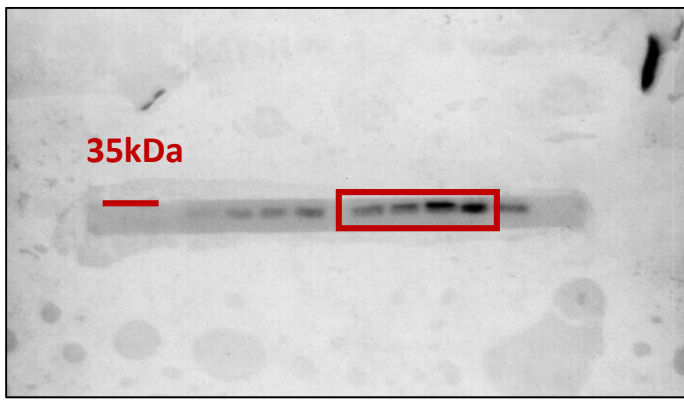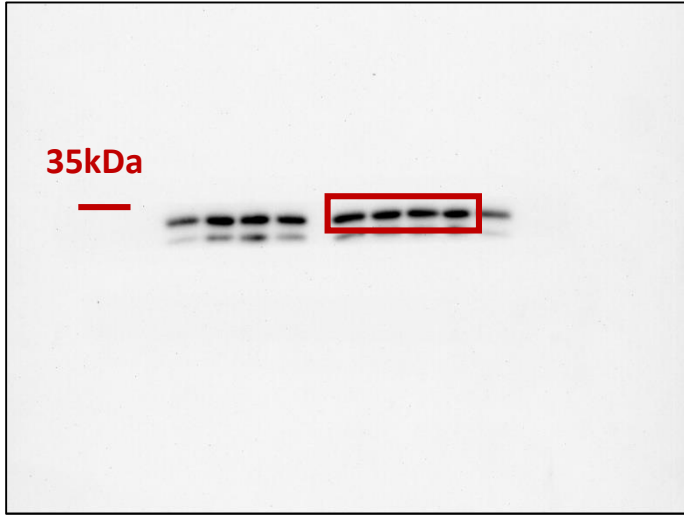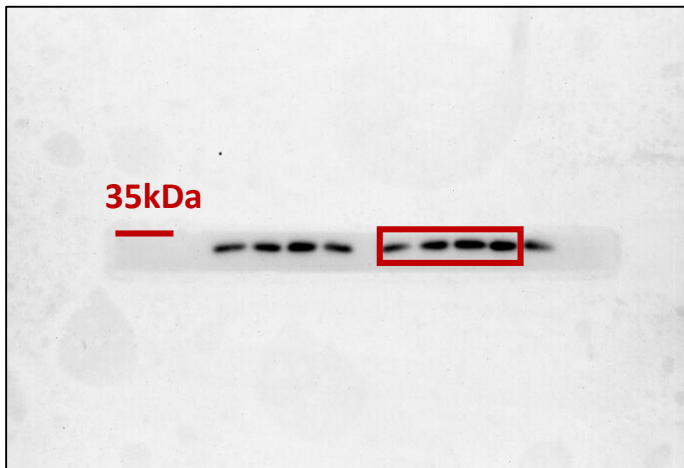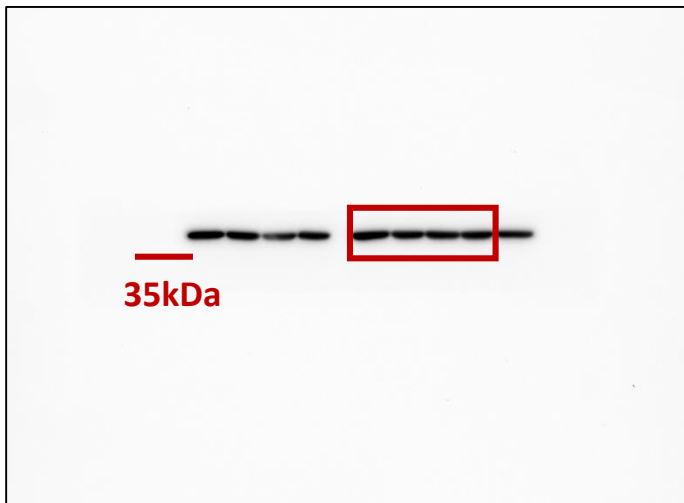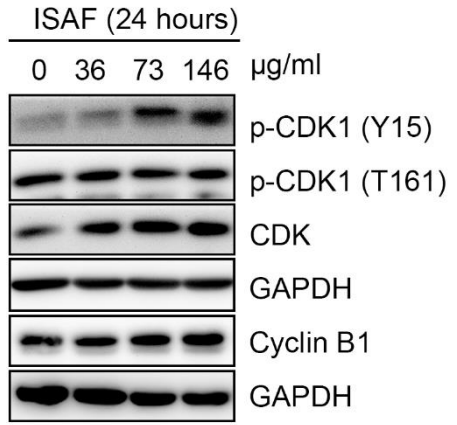



Figure 3A-left panel

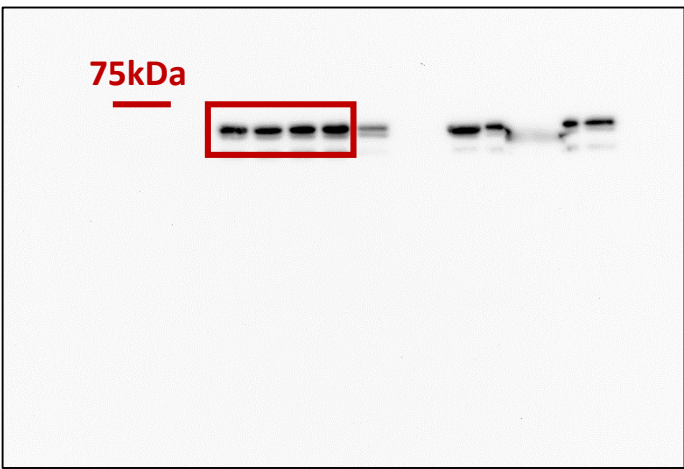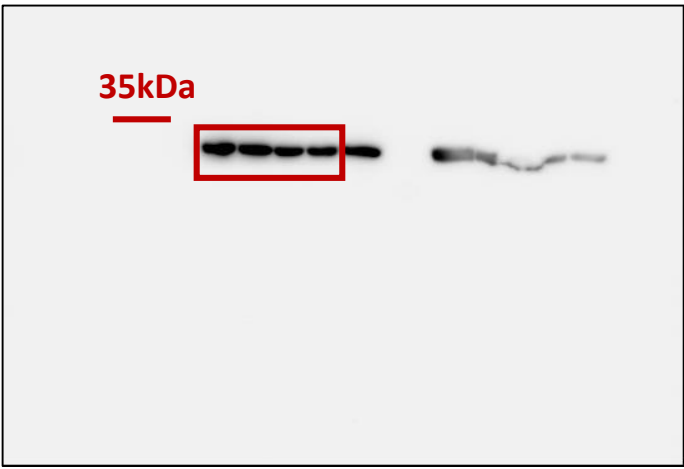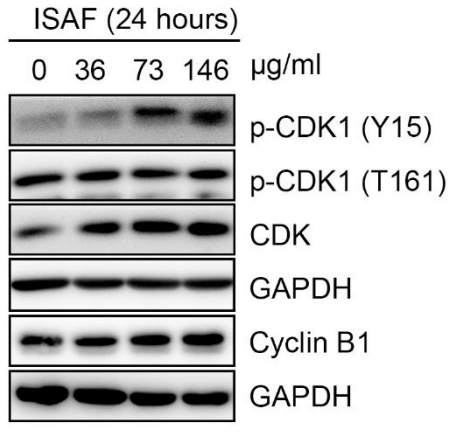

Figure 3A-right panel

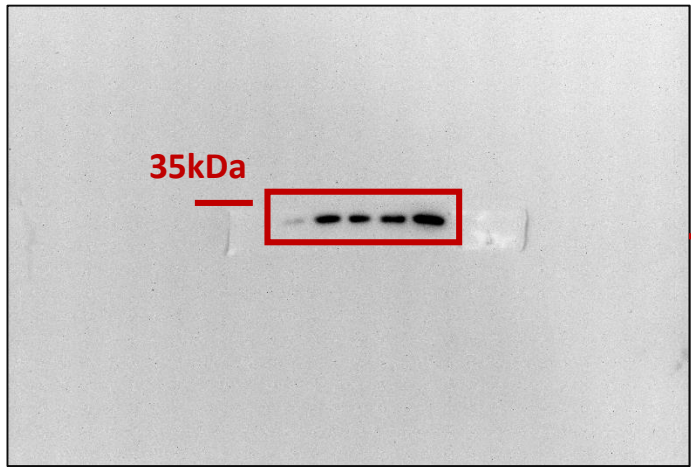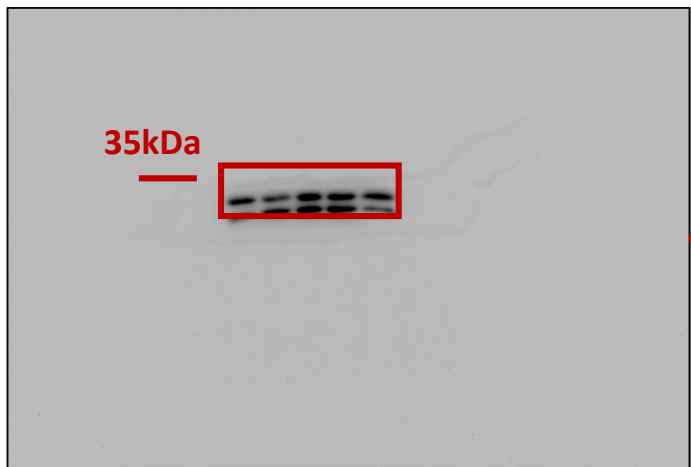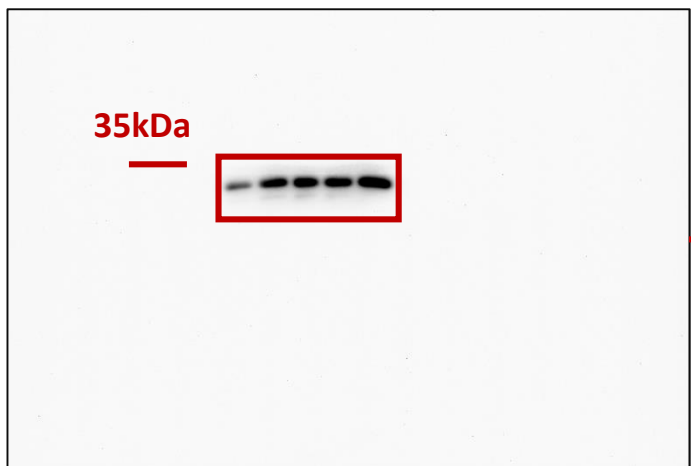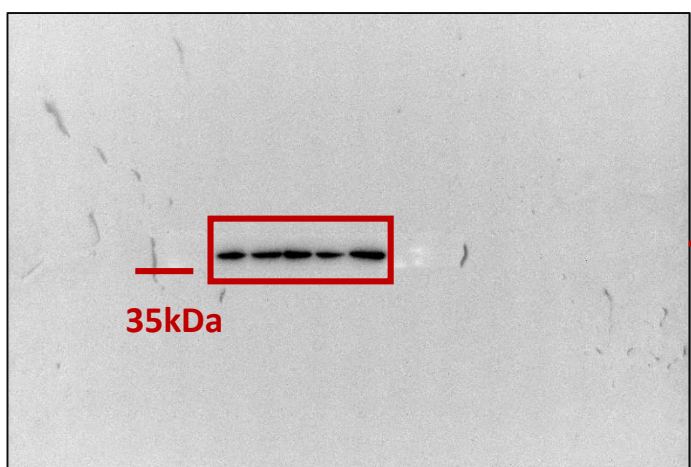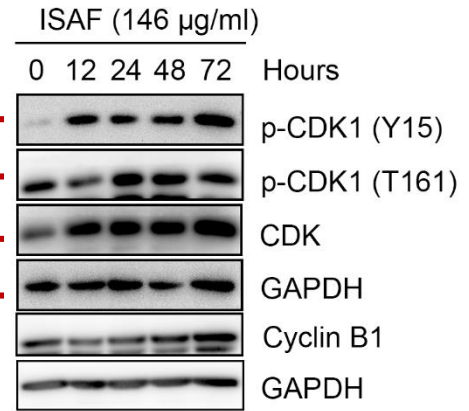

Figure 3A-right panel

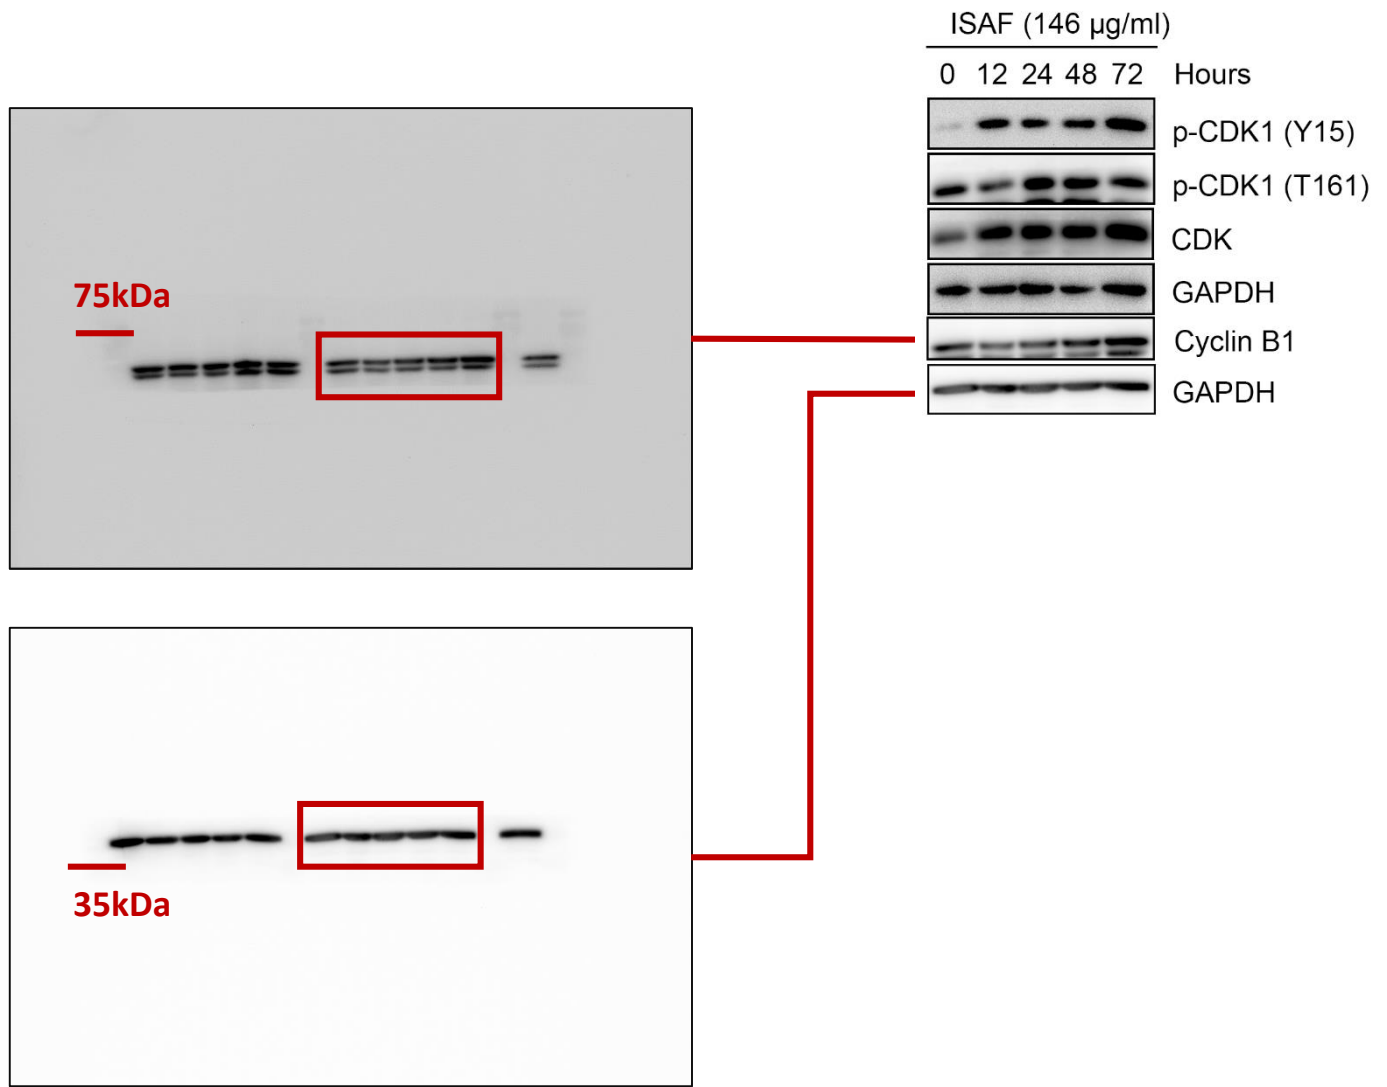

Figure 3B-left panel

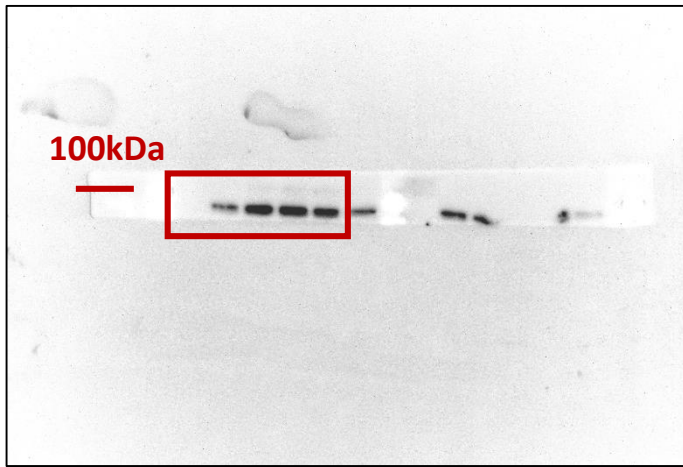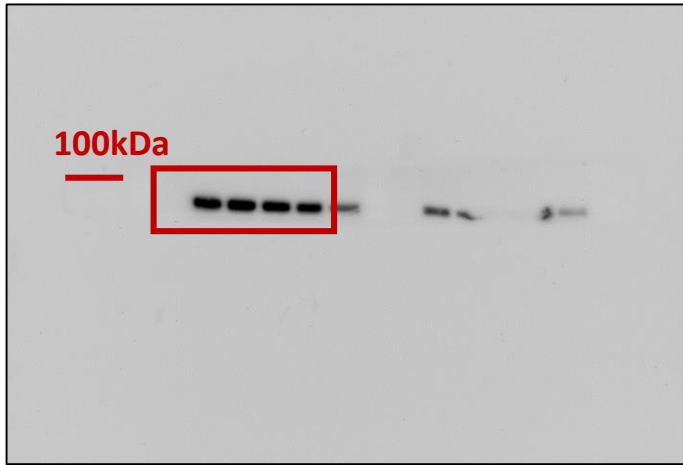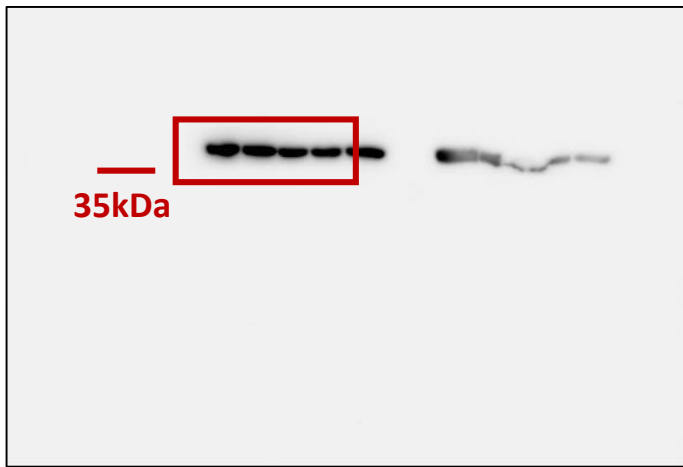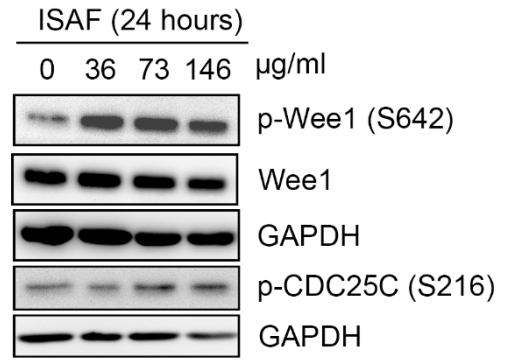

Figure 3B-left panel

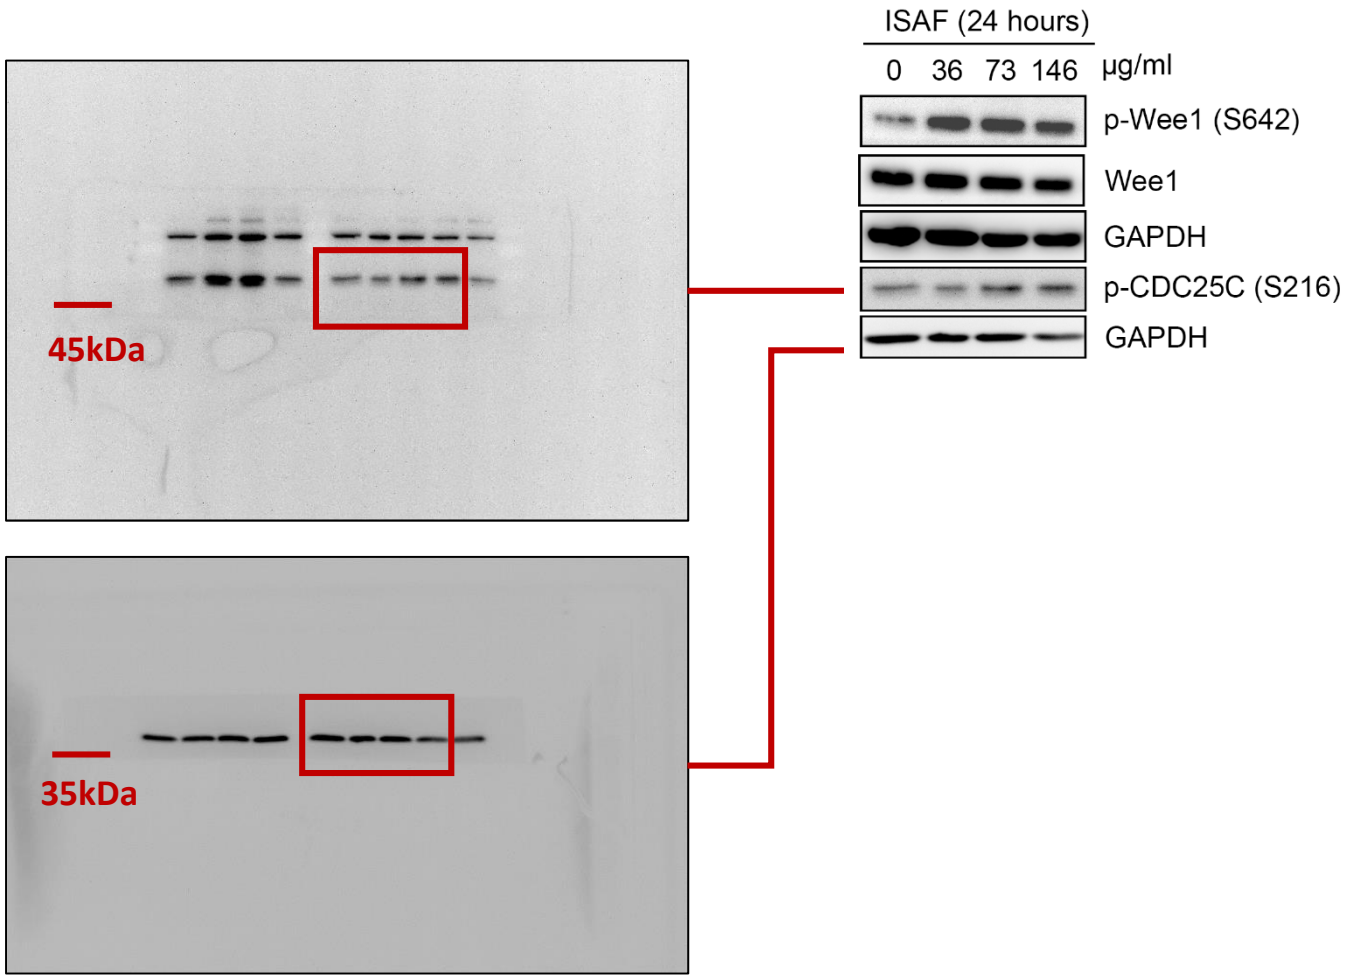

Figure 3B-right panel

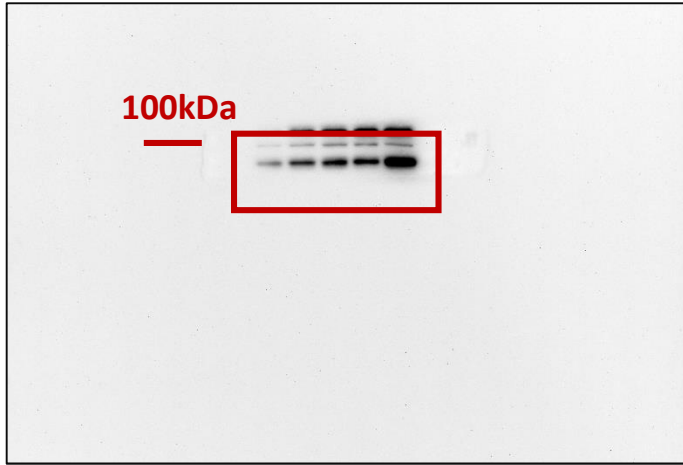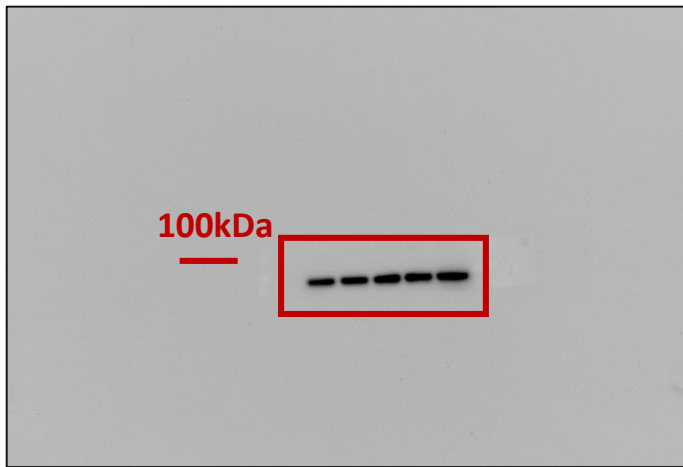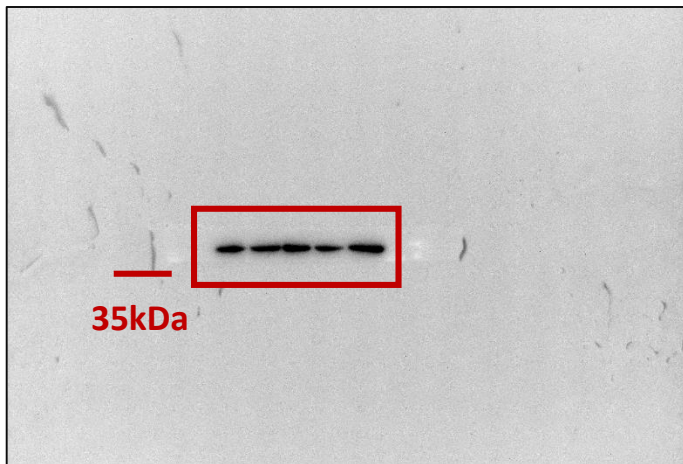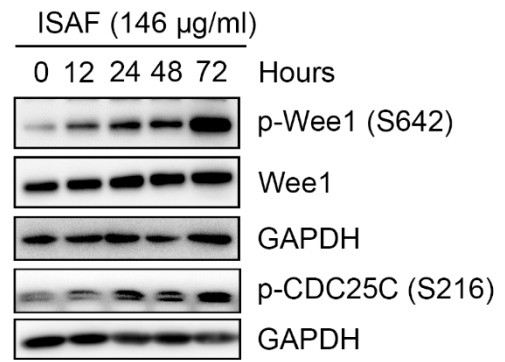

Figure 3B-right panel

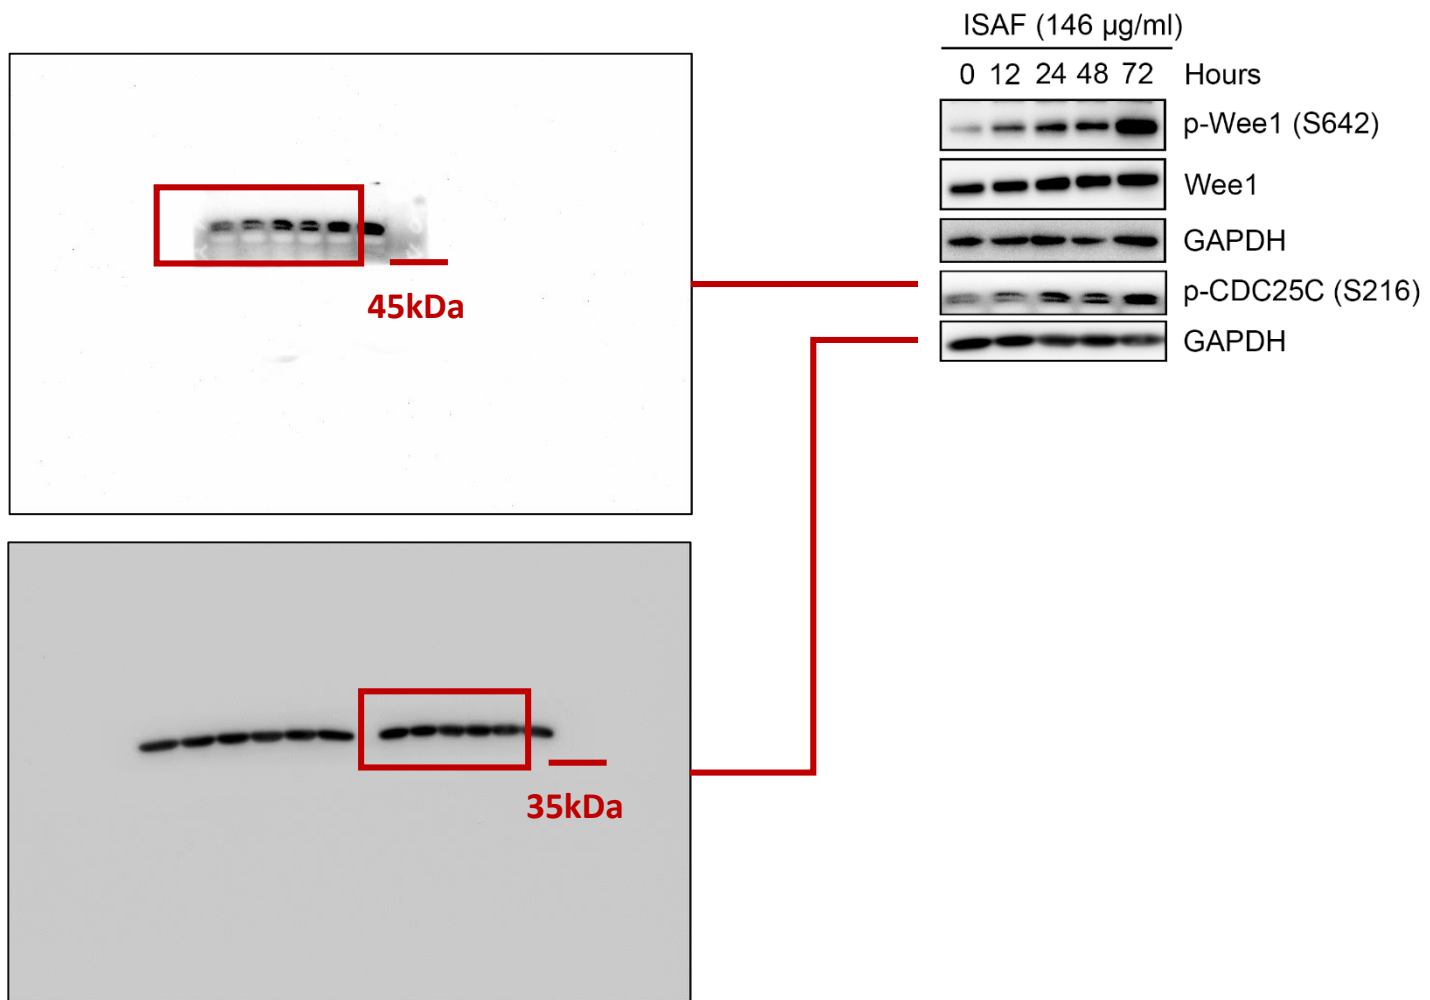

Figure 3C-left panel

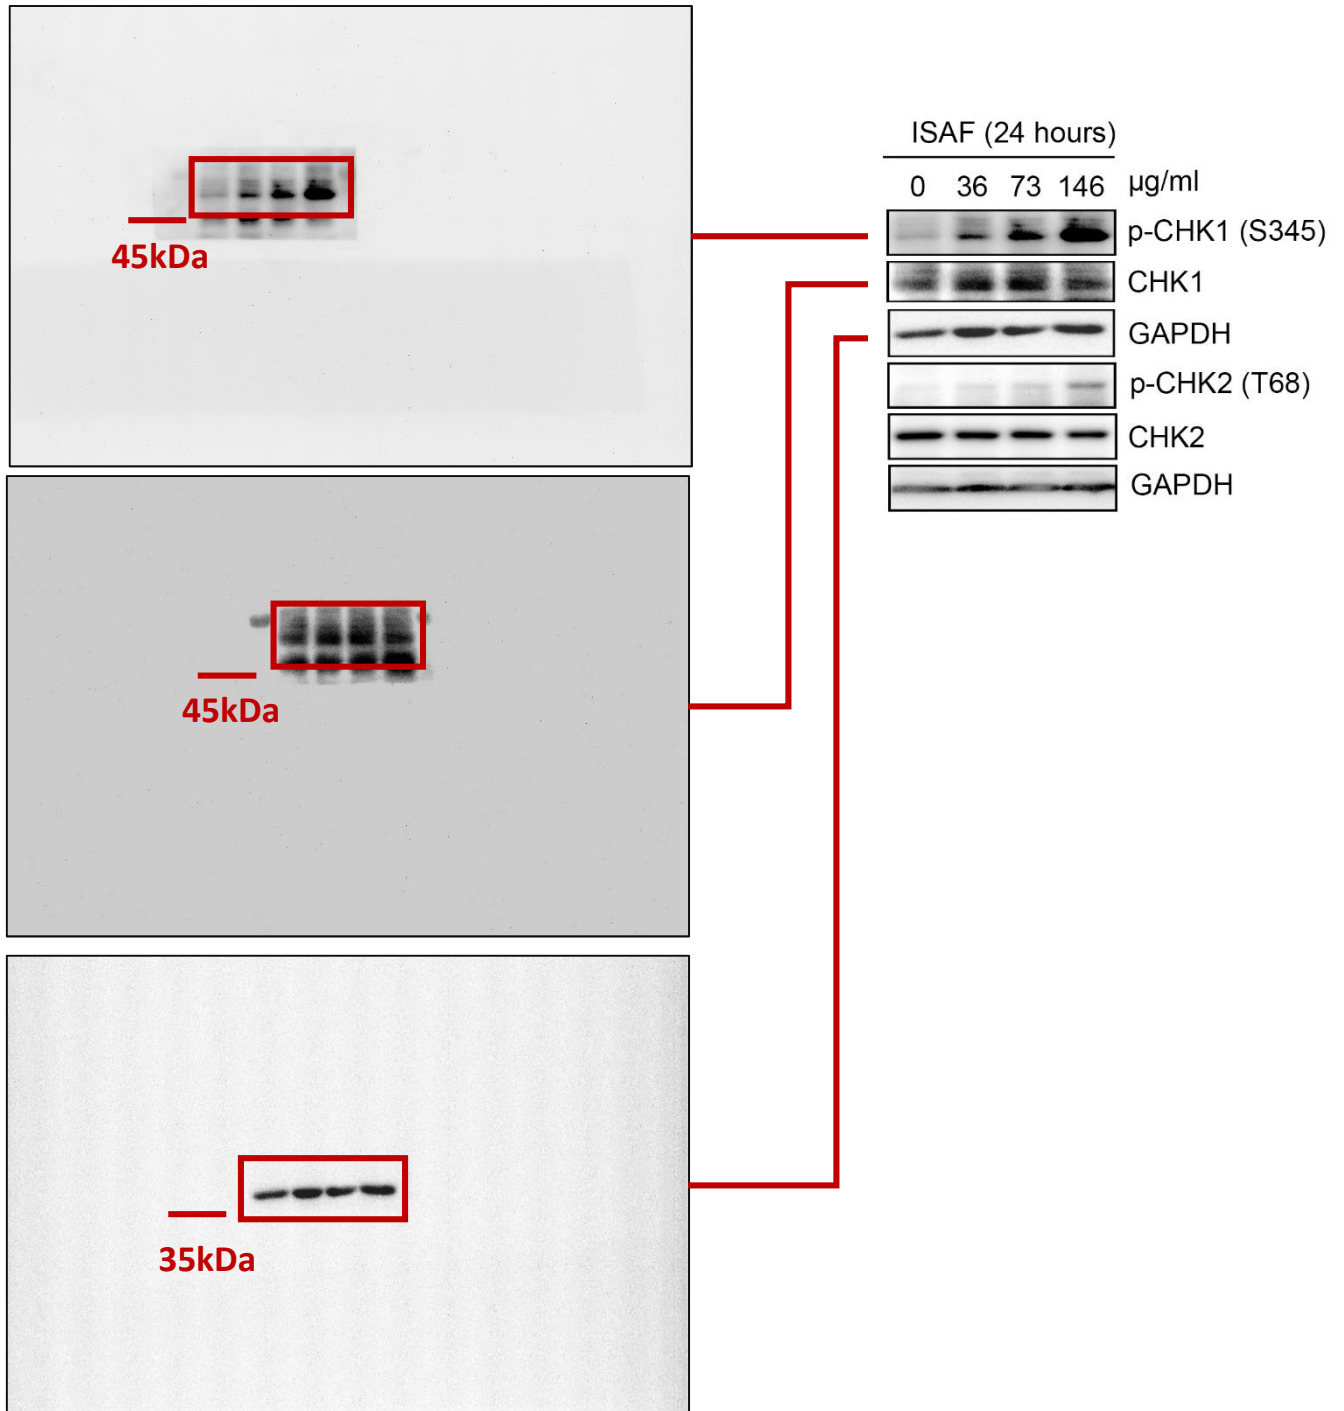



Figure 3C-left panel

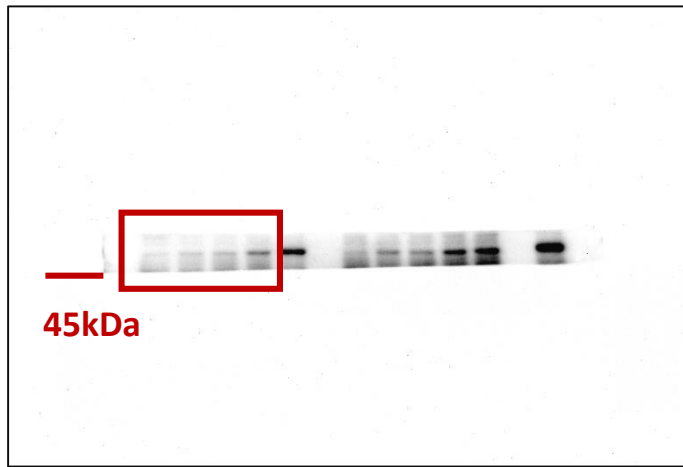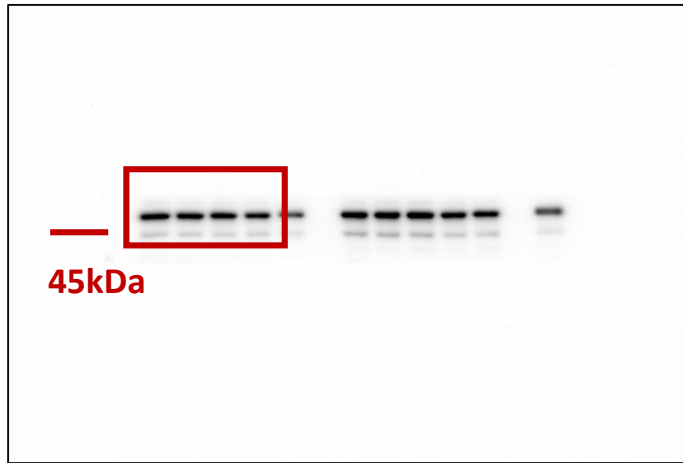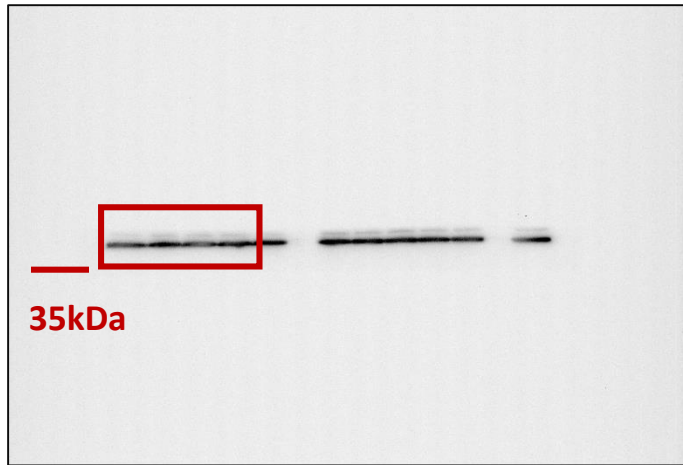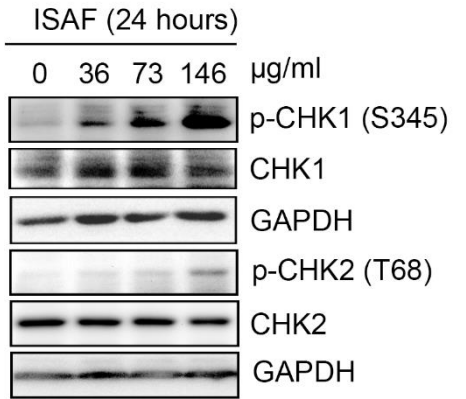

Figure 3C-right panel

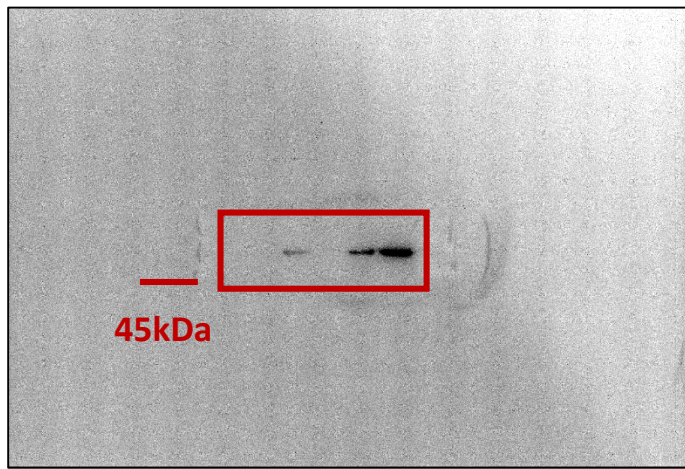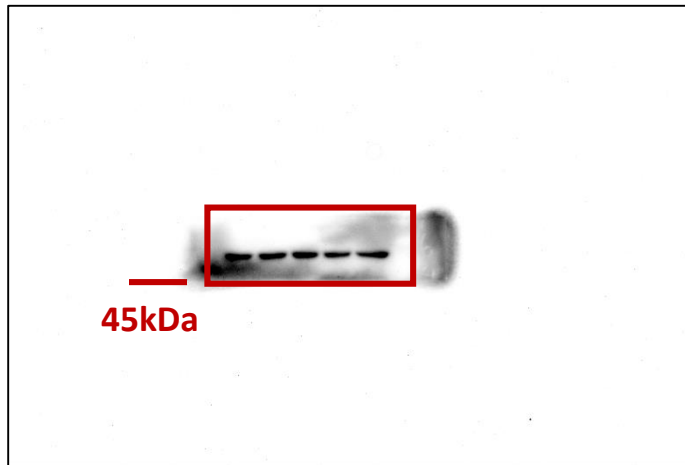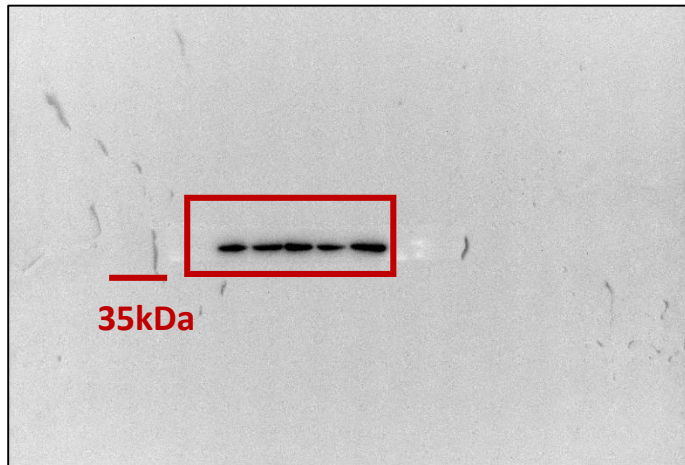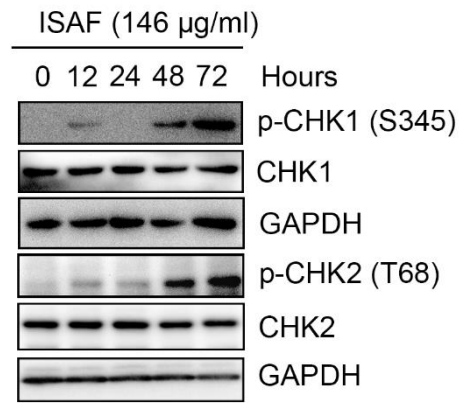

Figure 3C-right panel

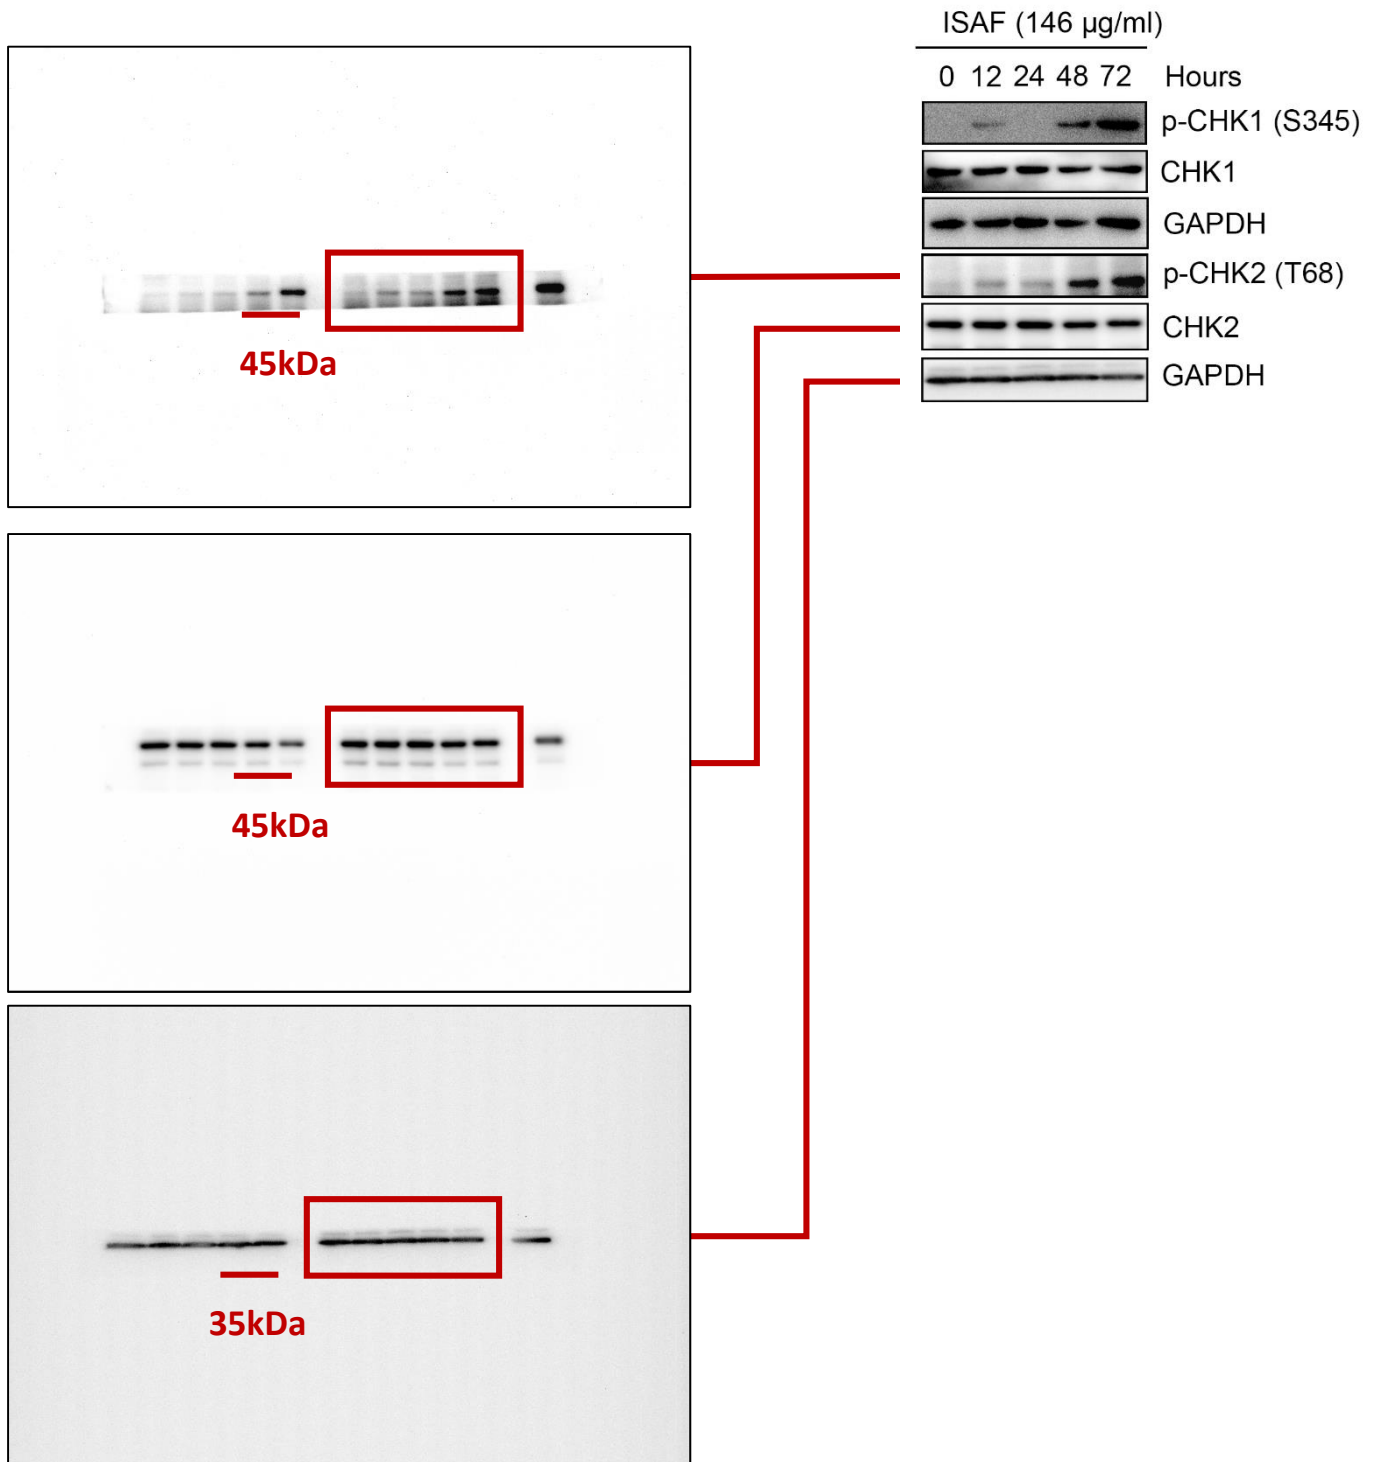

Figure 3D-left panel

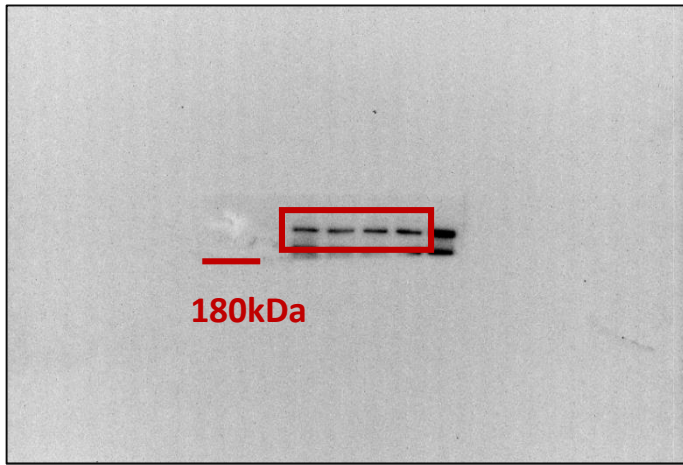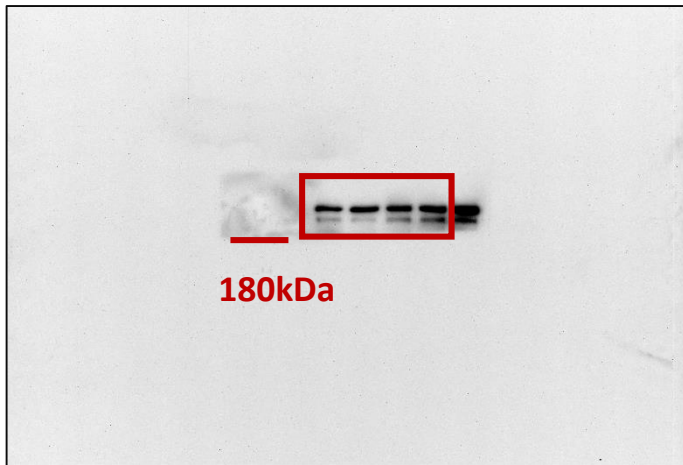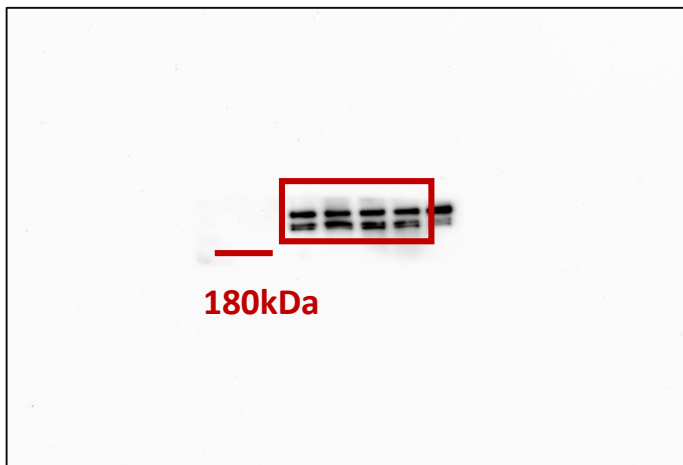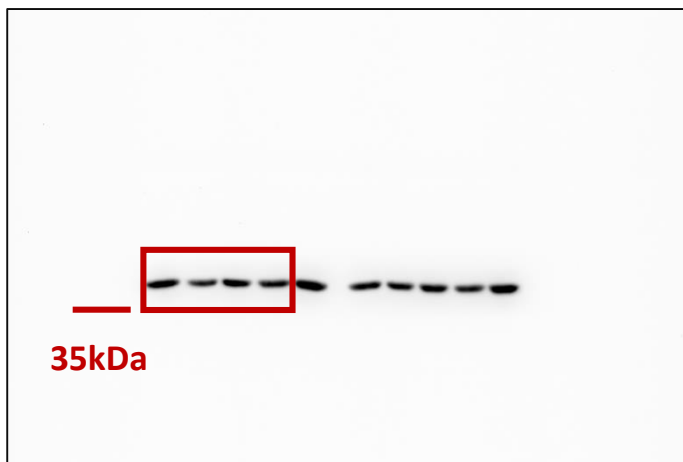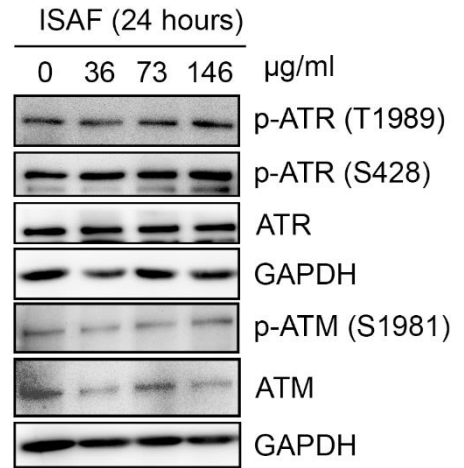

Figure 3D-left panel

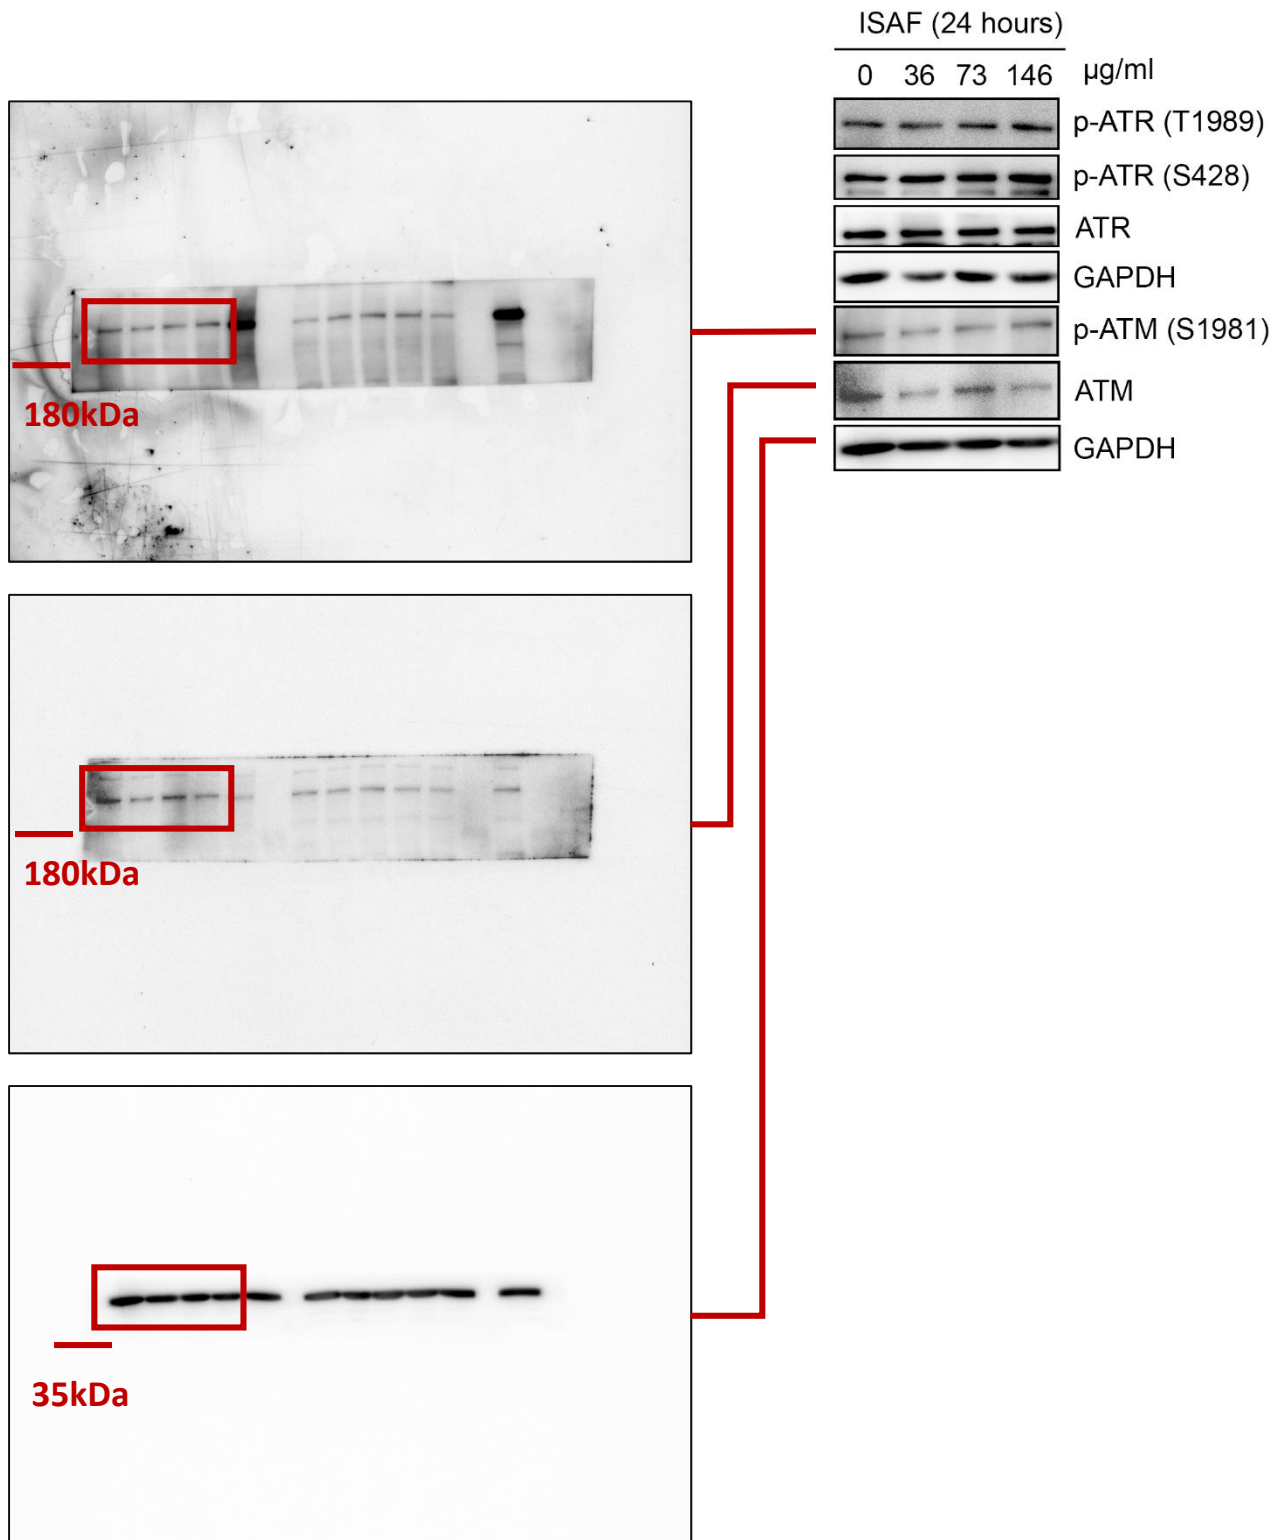

Figure 3D-right panel

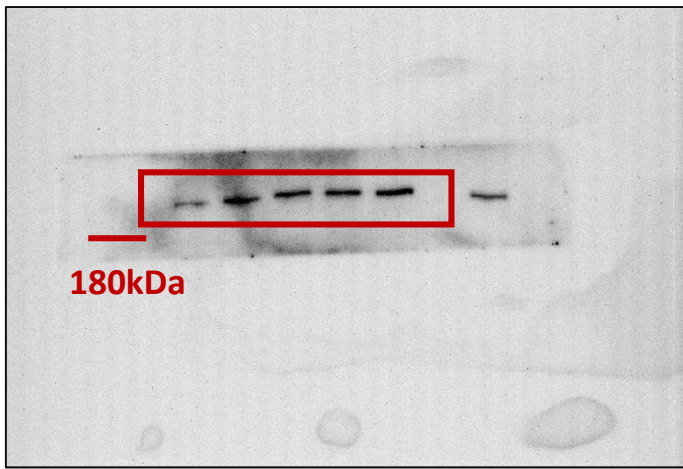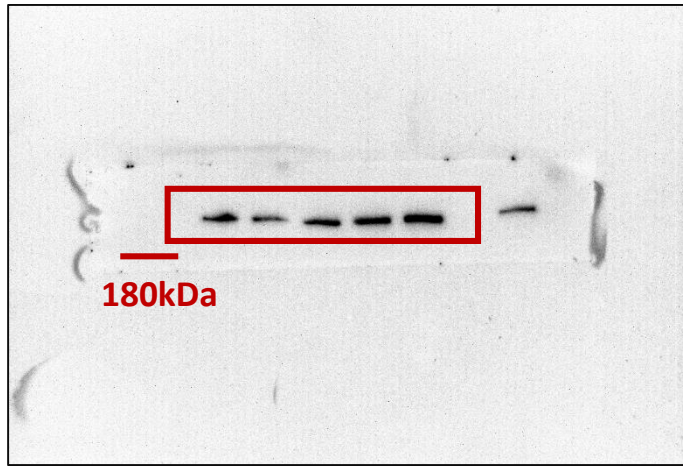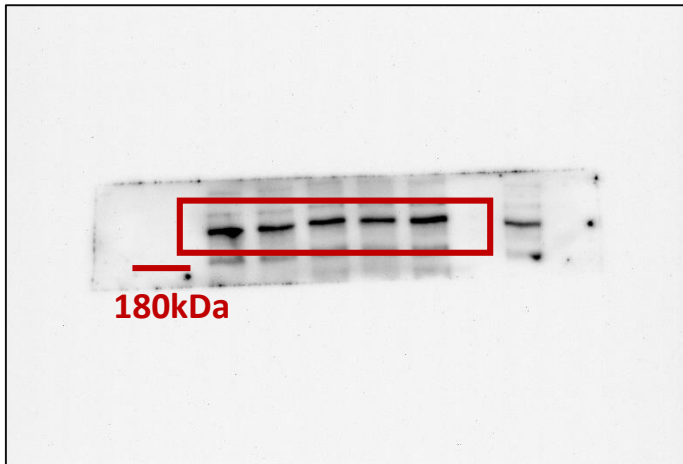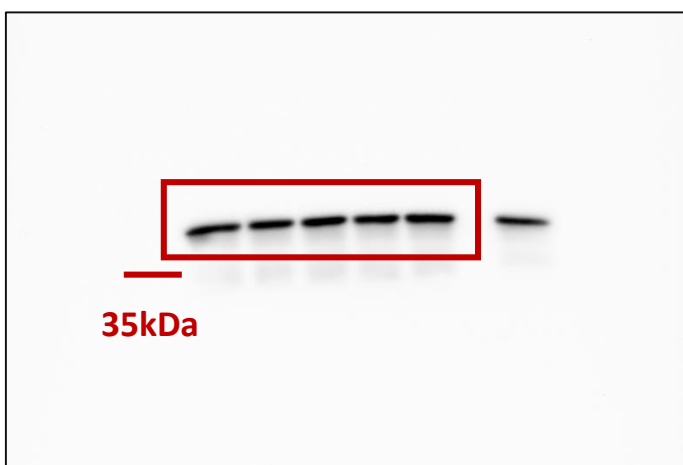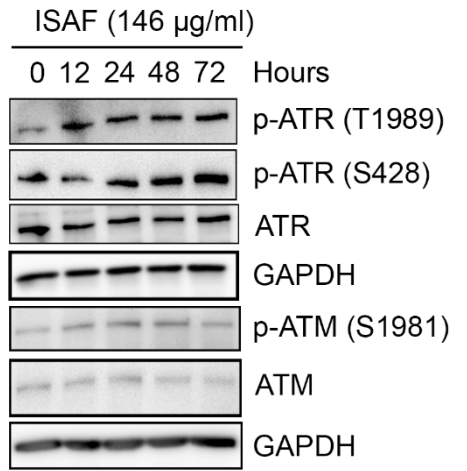

Figure 3D-right panel

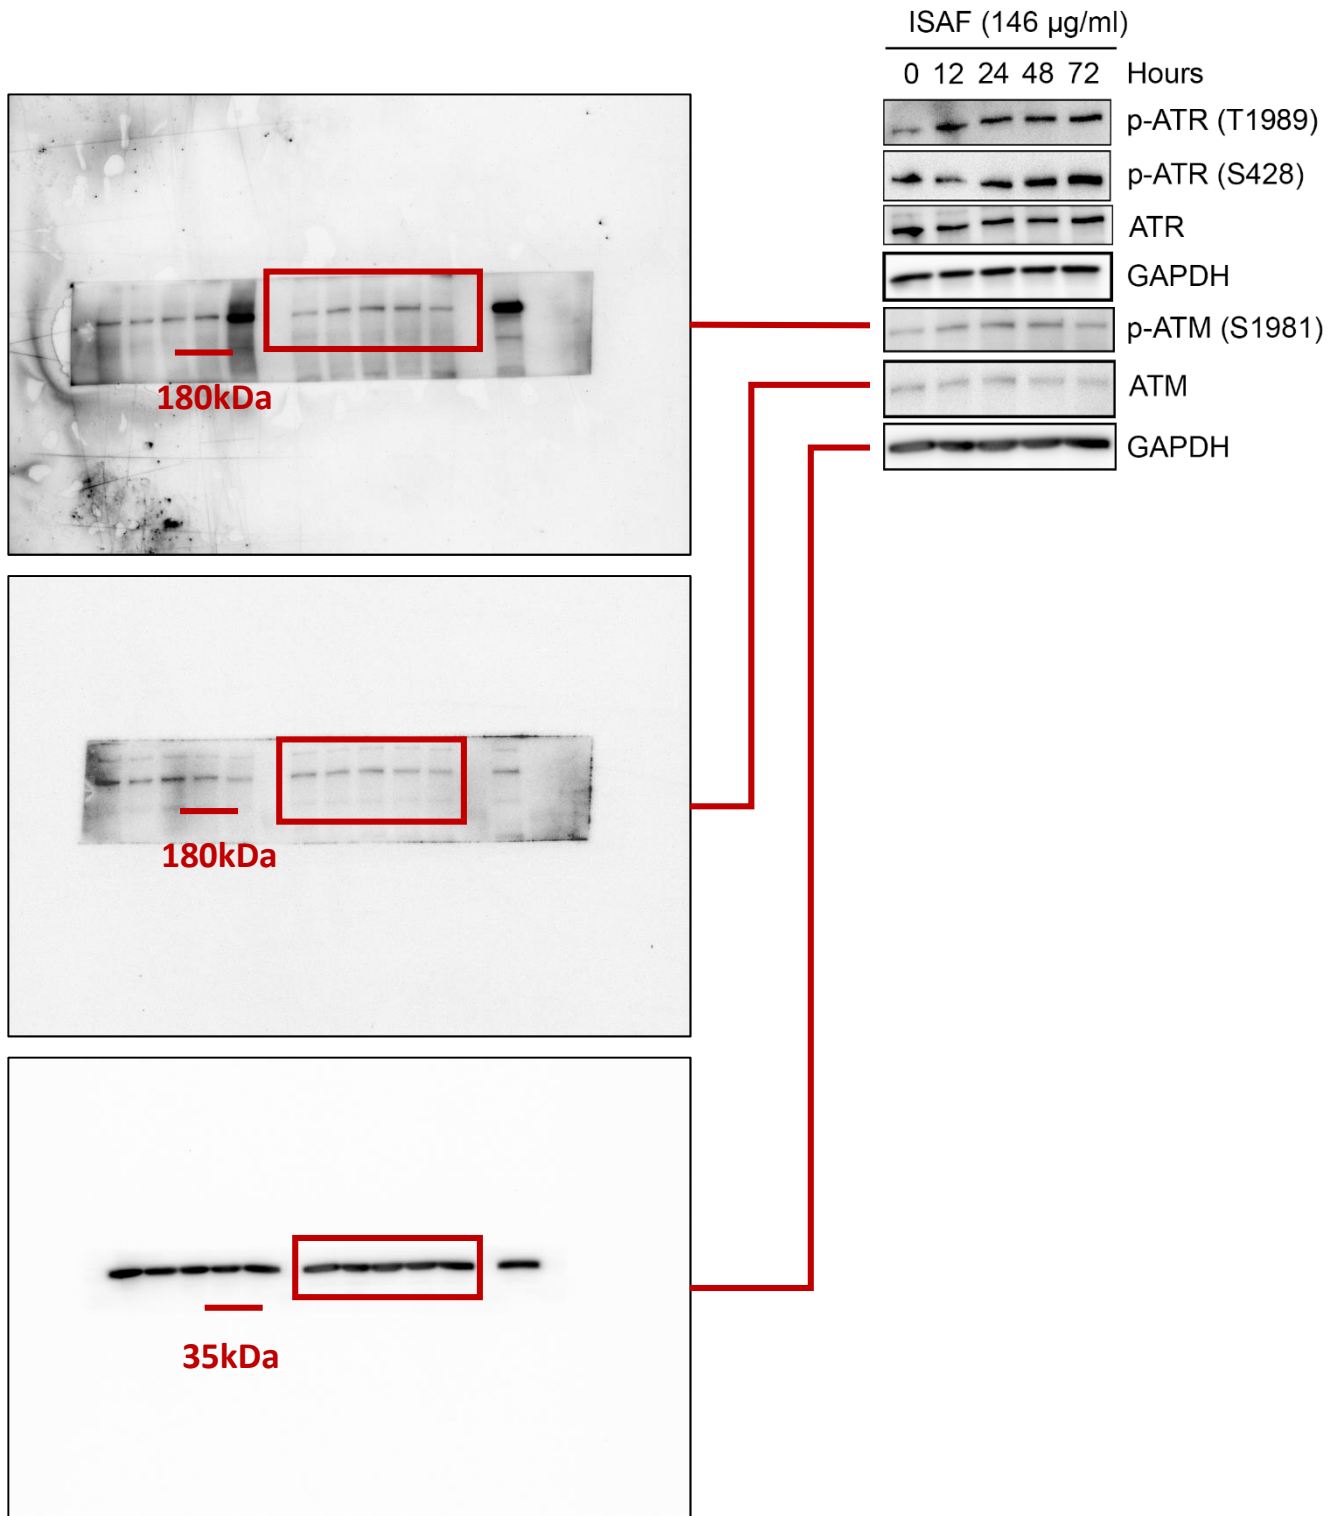

Figure 4C

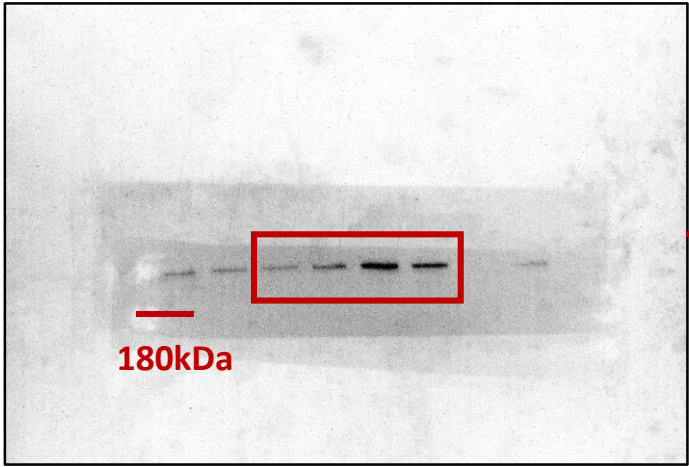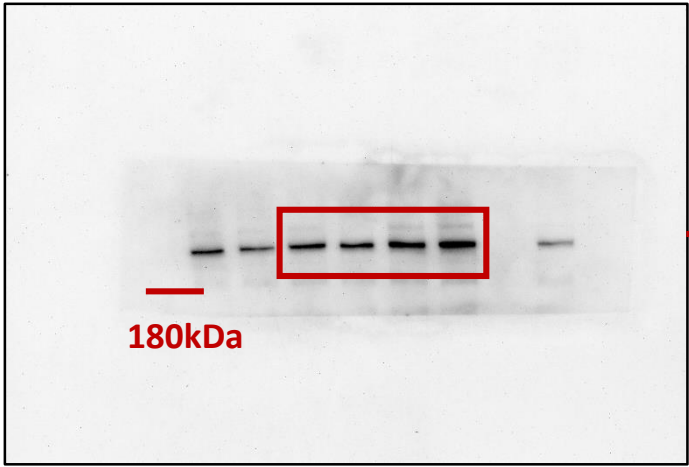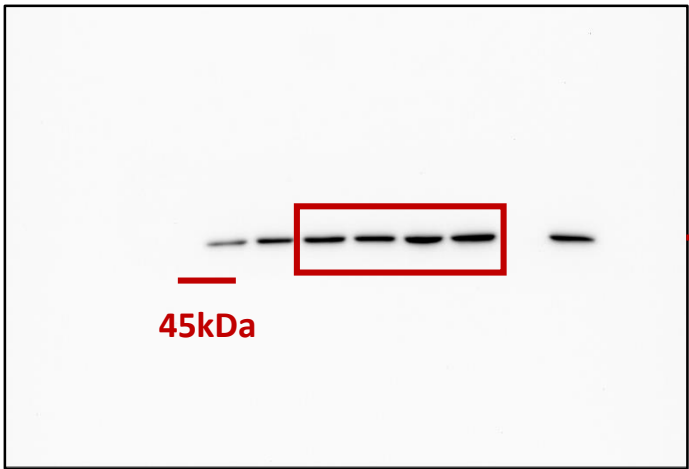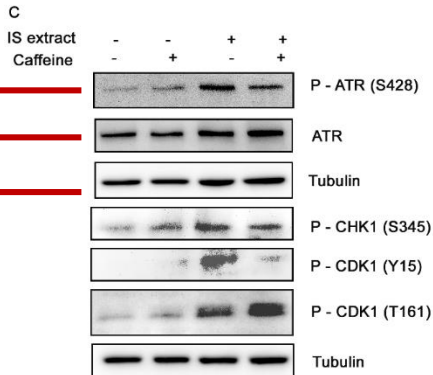



Figure 4C

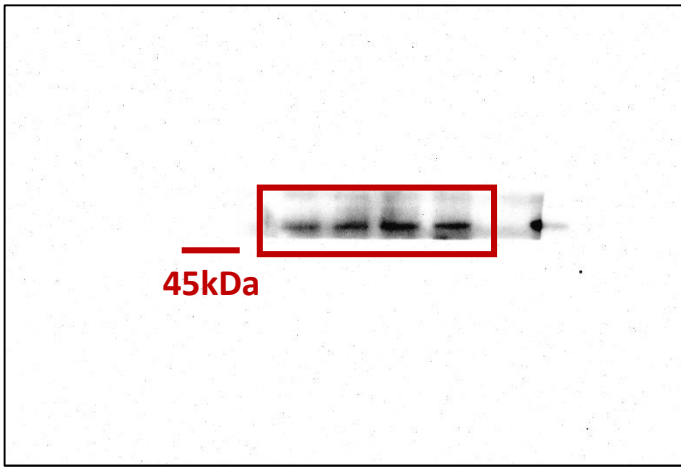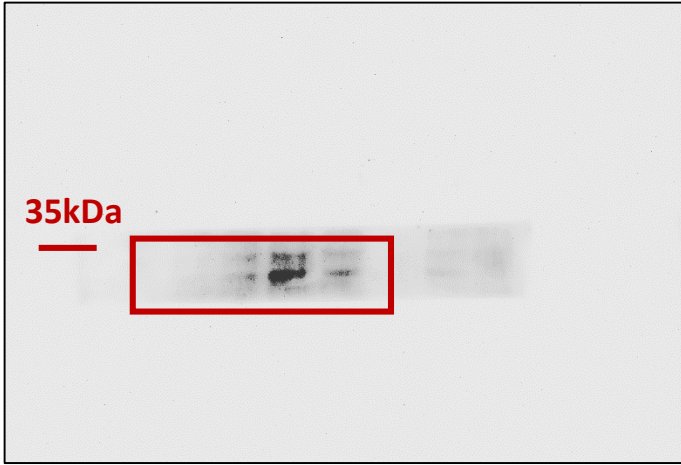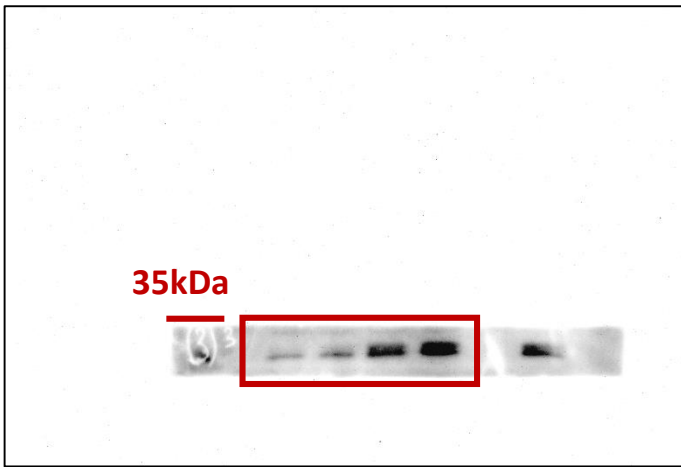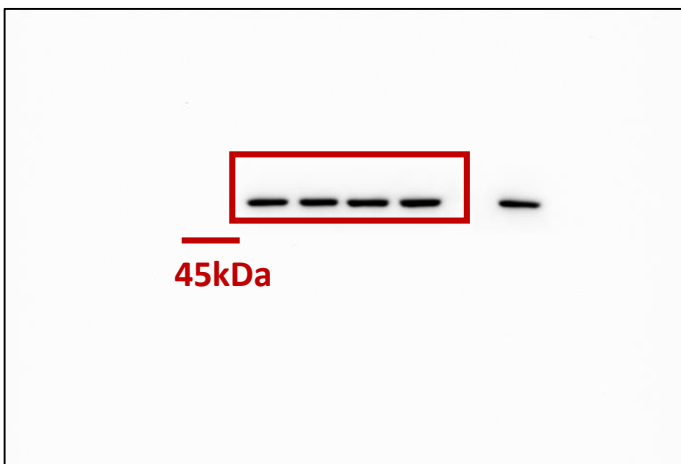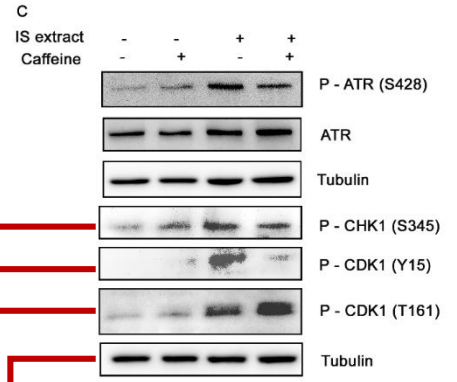

# Multiple exposure images of WB

# Figure 3A-dose-manner

\*: Presented photo

Increasing exposure time

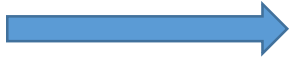

ISAF (24 hours)

0 36 73 146 µg/ml

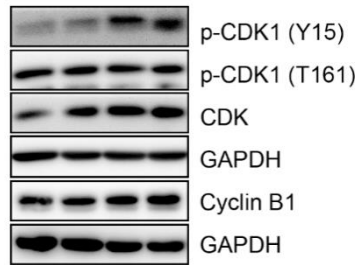

1

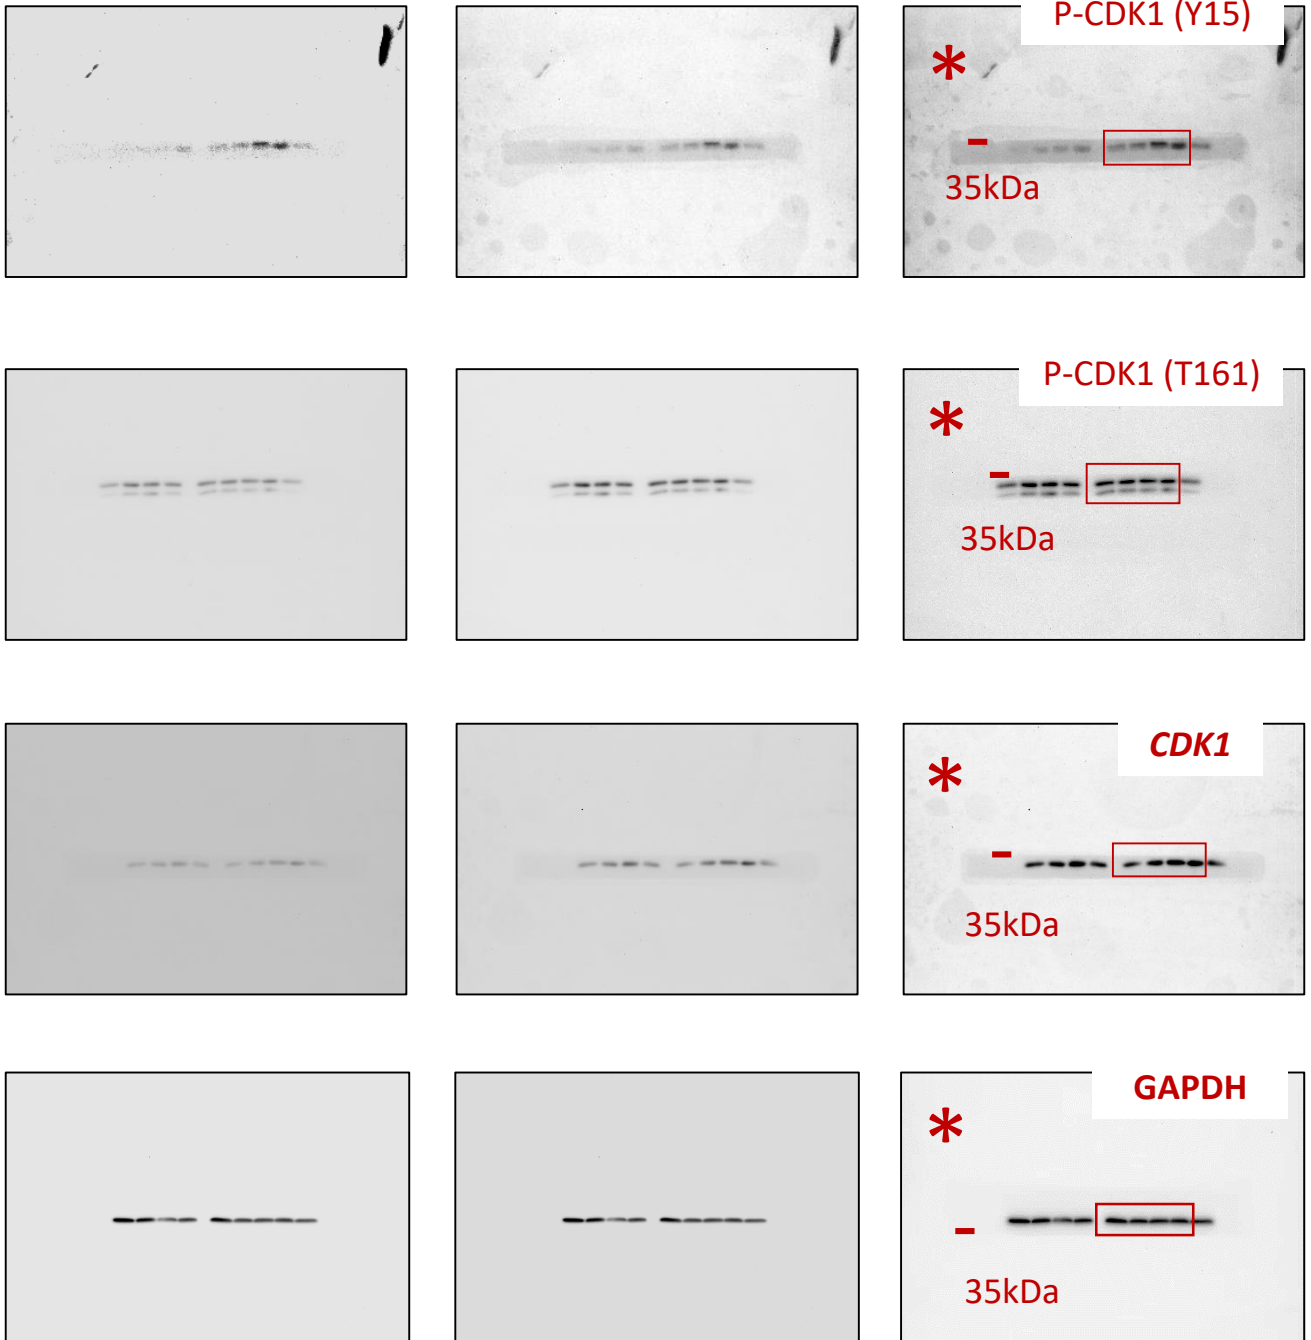

# Figure 3A-dose manner

2

\*: Presented photo

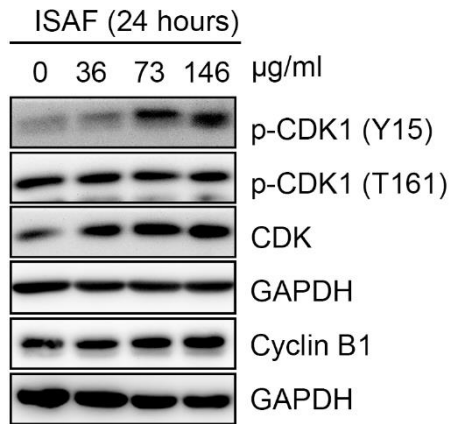

Increasing exposure time

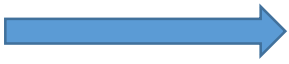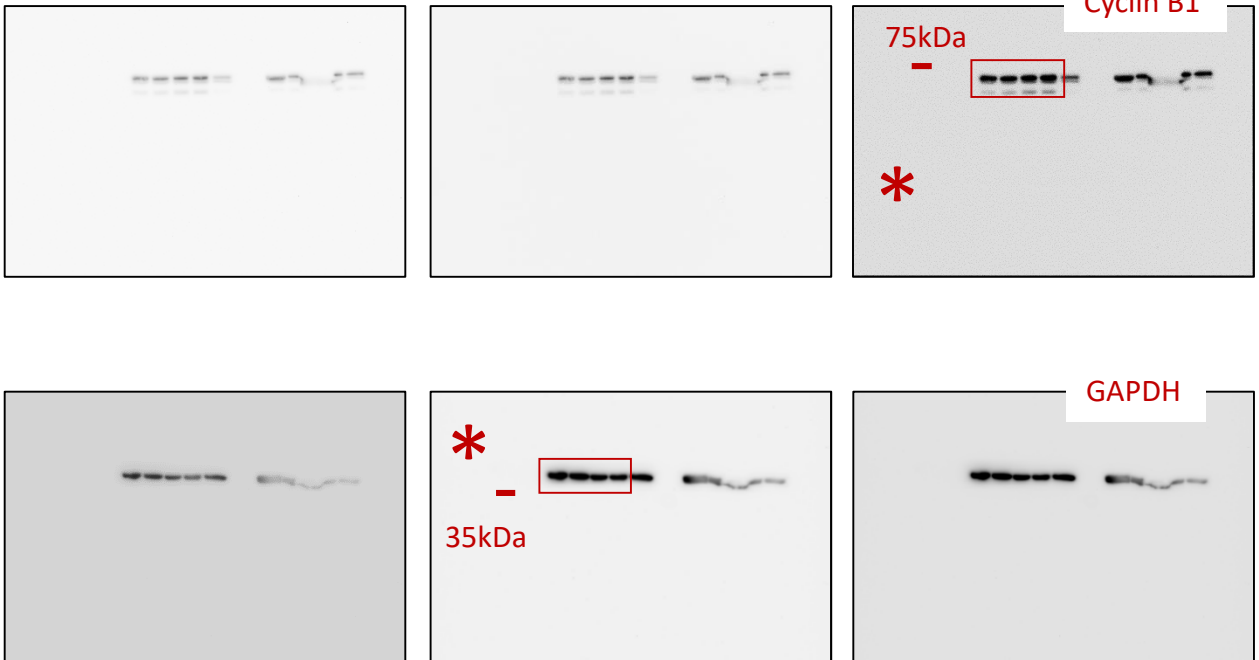

# Figure 3A time manner

ISAF (146 µg/ml)

3

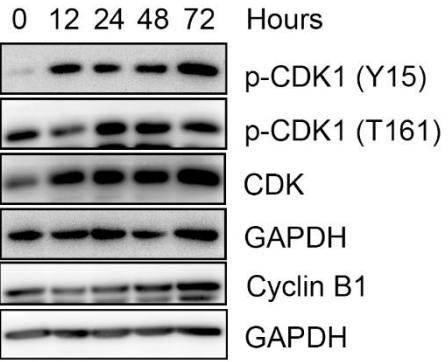

\*: Presented photo

Increasing exposure time

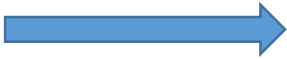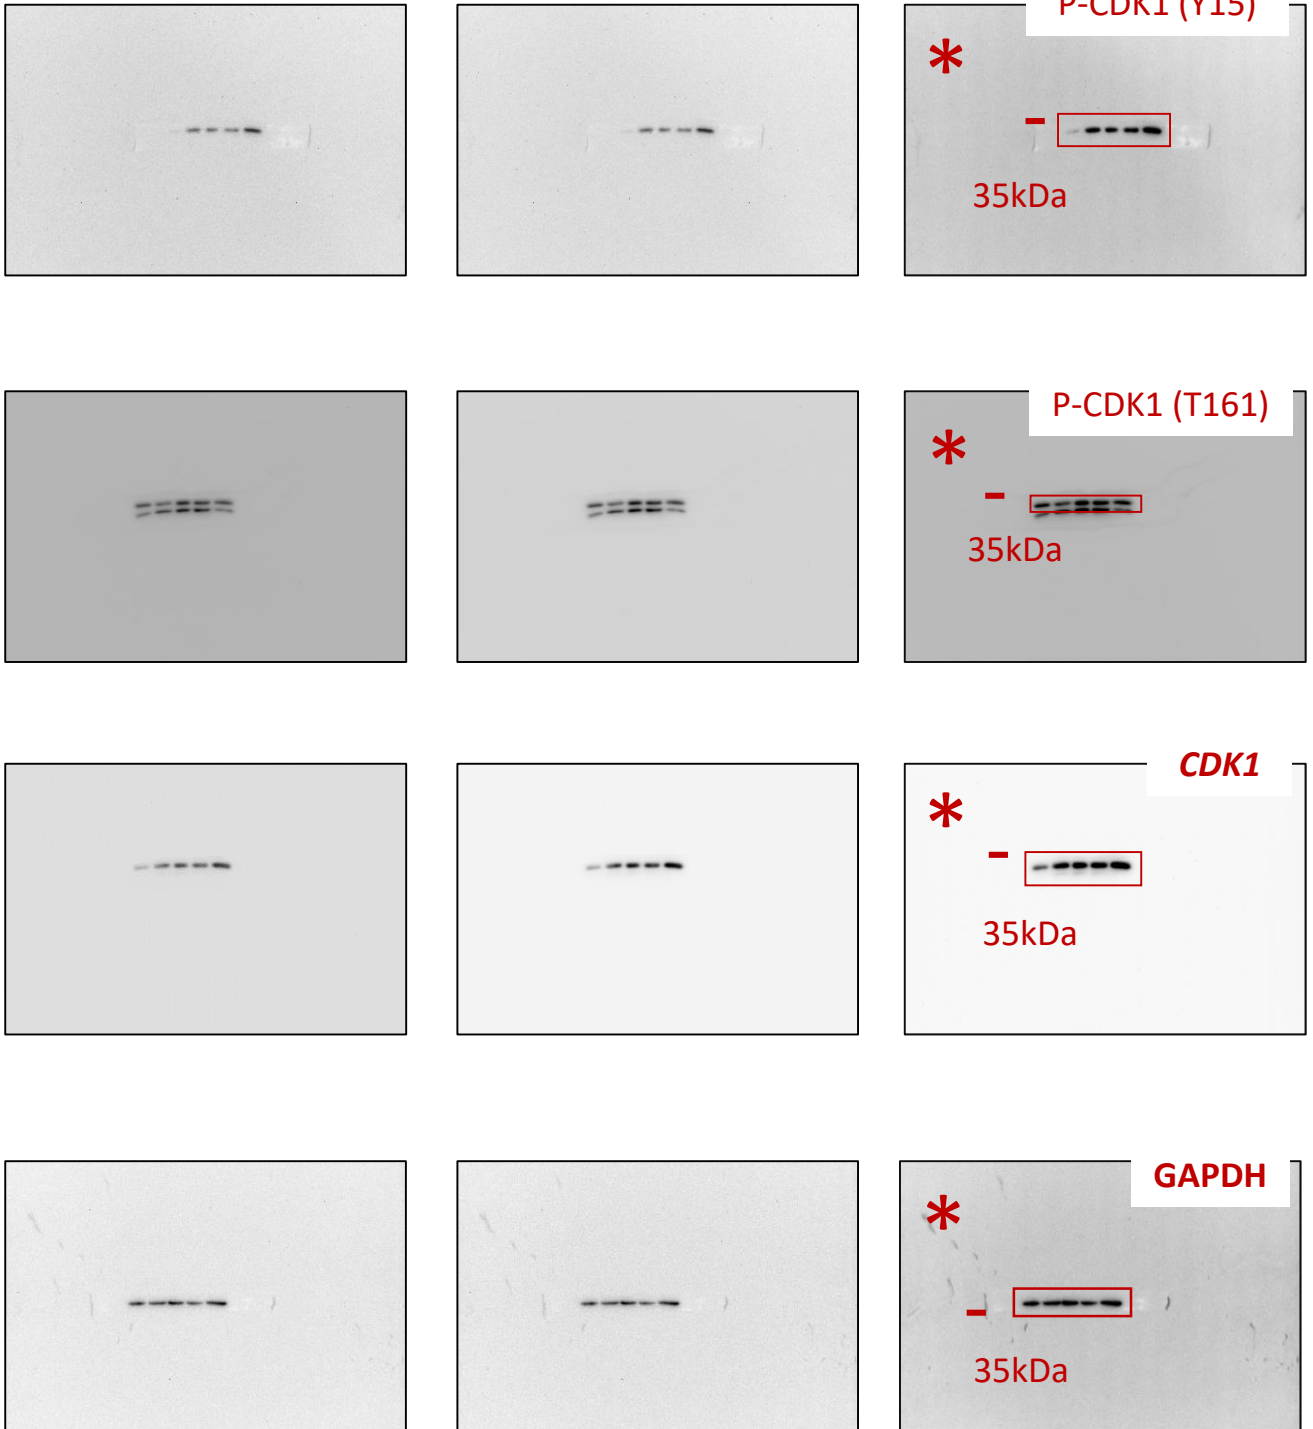

Figure 3A-right panel

\*: Presented photo

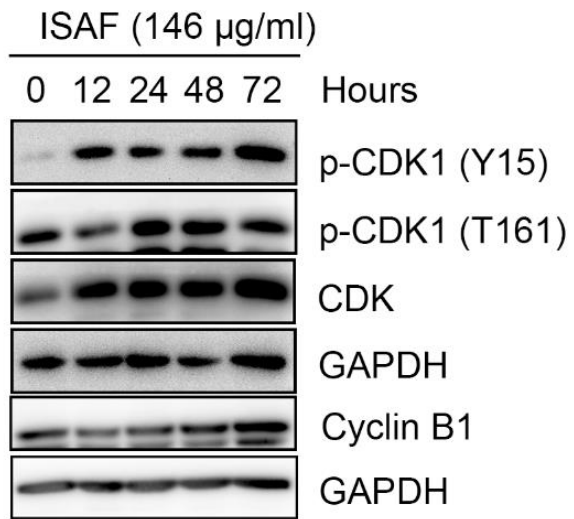

Increasing exposure time

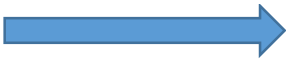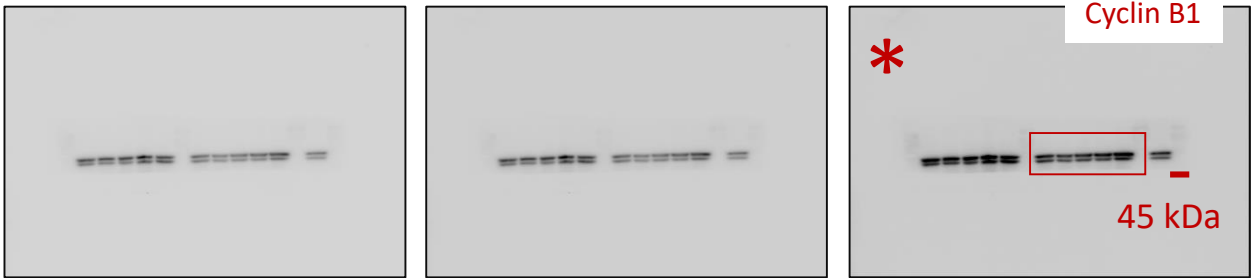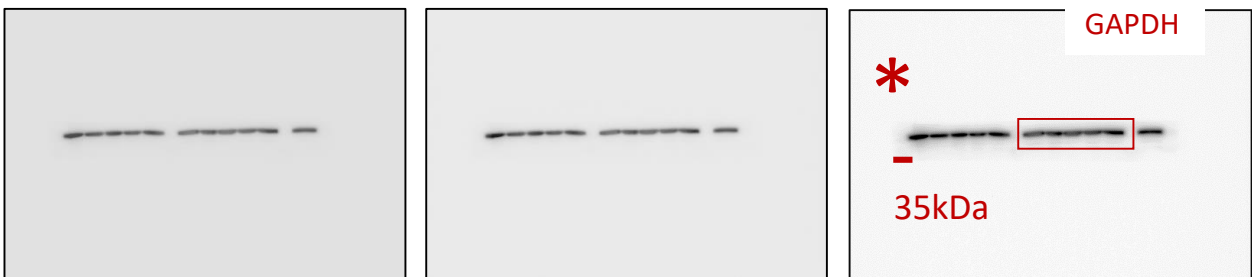

# Figure 3B – dose manner

\*: Presented photo

Increasing exposure time

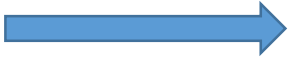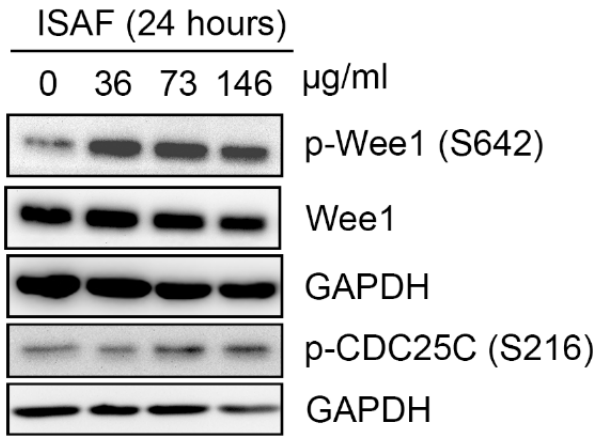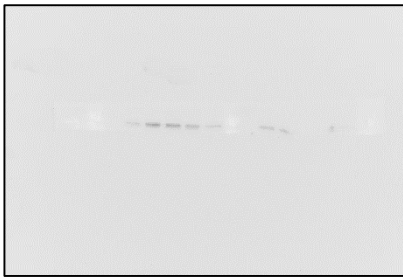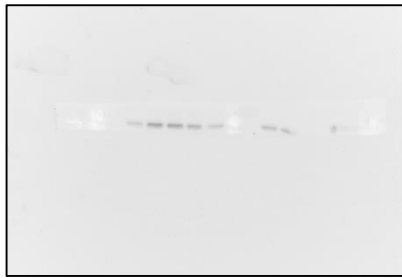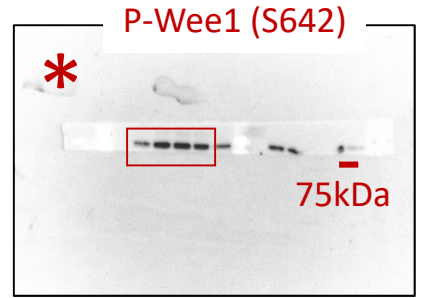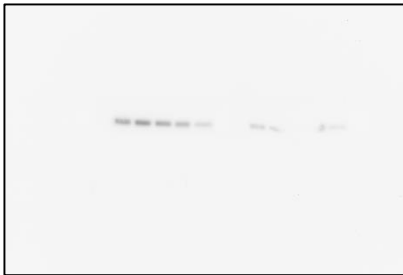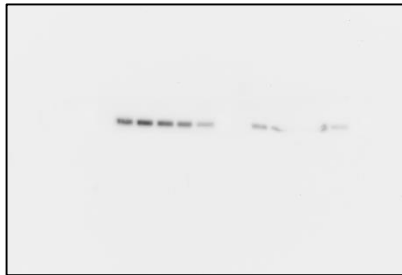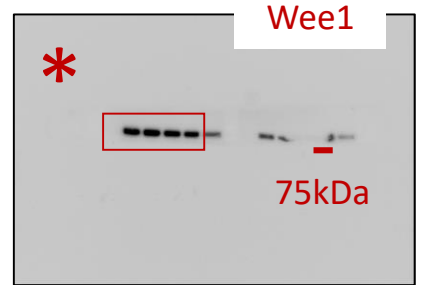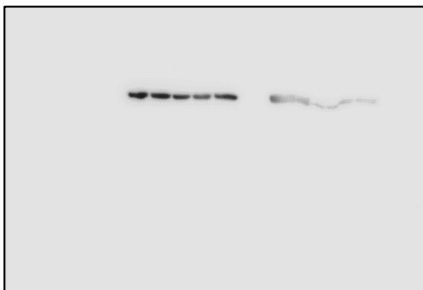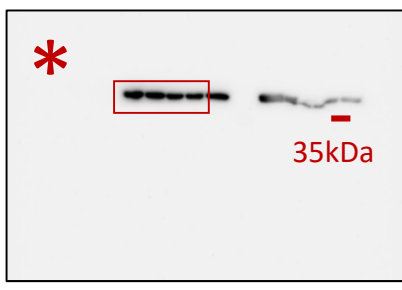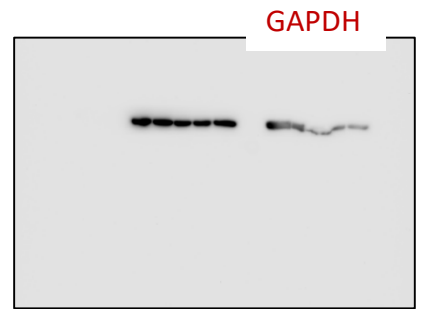

# Figure 3B - dose manner

\*: Presented photo

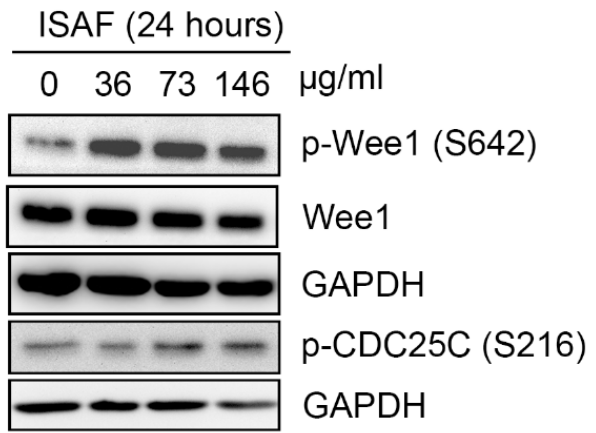

Increasing exposure time

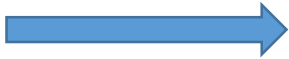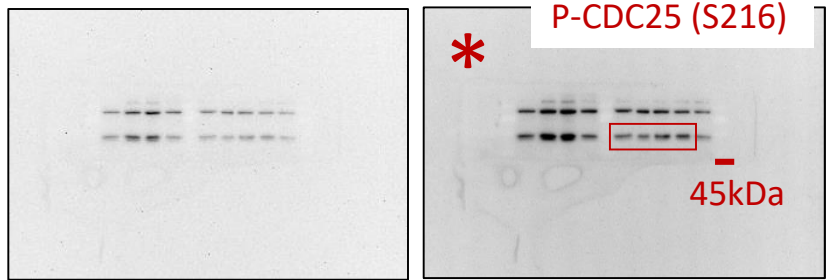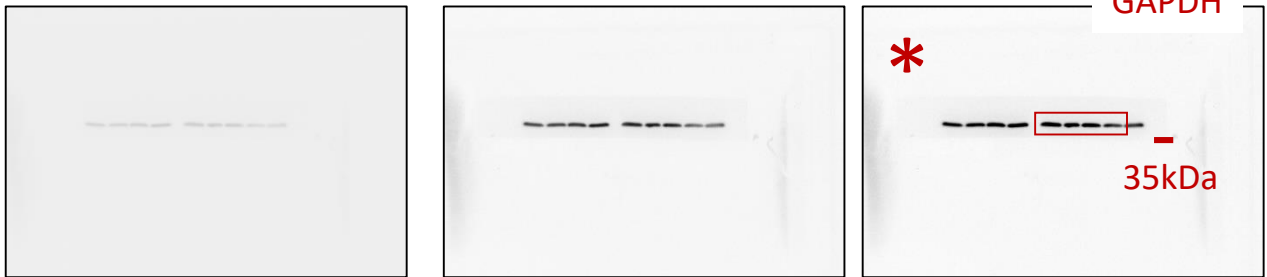



# Figure 3B-right panel

ISAF (146  $\mu\text{g/ml}$ )

7

\*: Presented photo

0 12 24 48 72 Hours

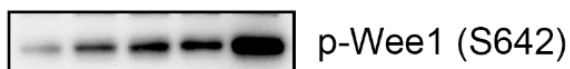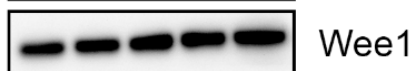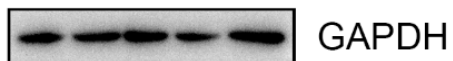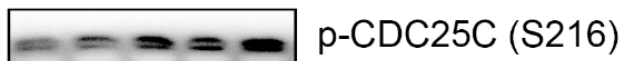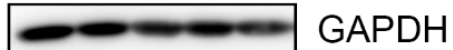

Increasing exposure time

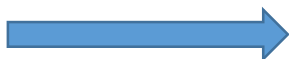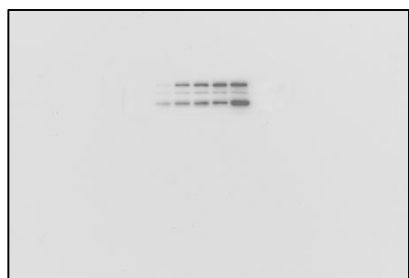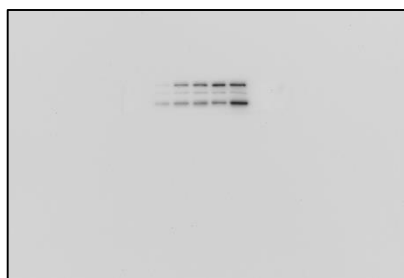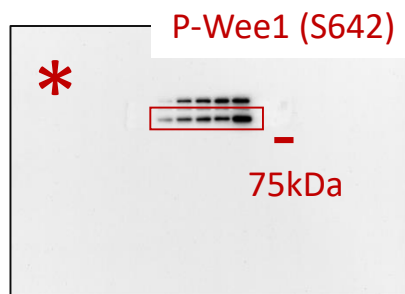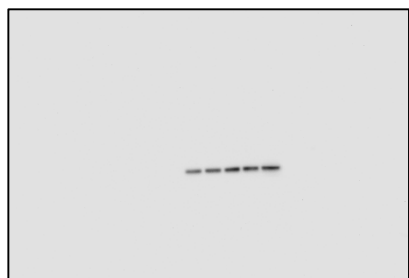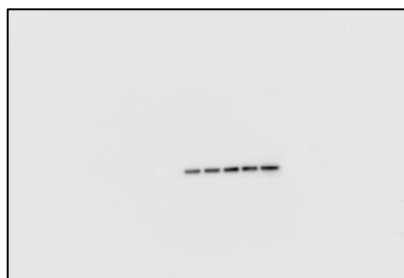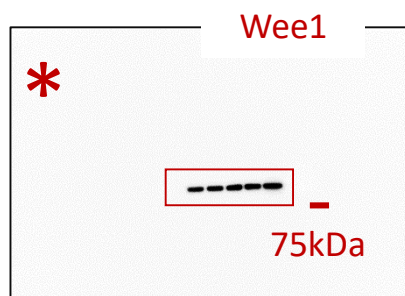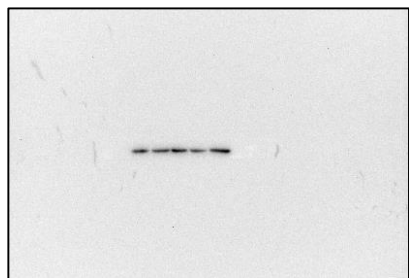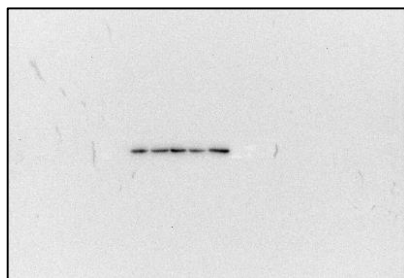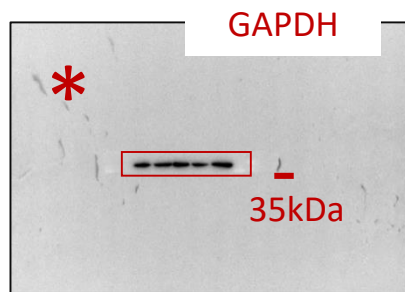

# Figure 3B time manner

ISAF (146  $\mu\text{g/ml}$ )

8

\*: Presented photo

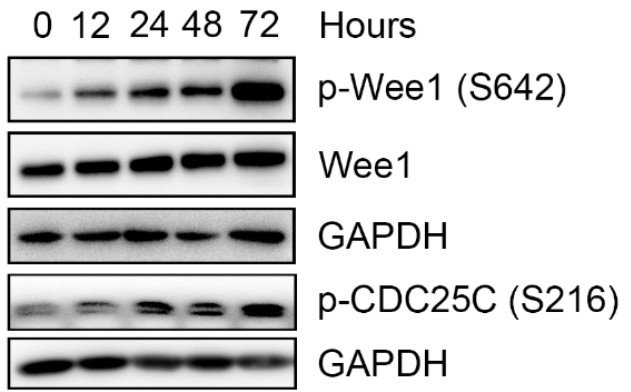

Increasing exposure time

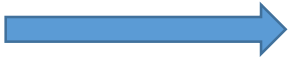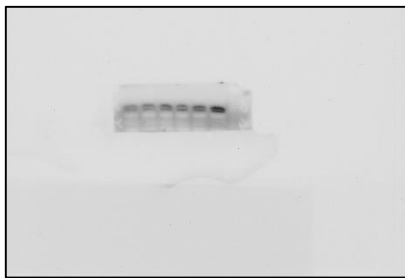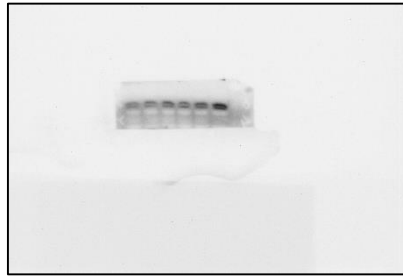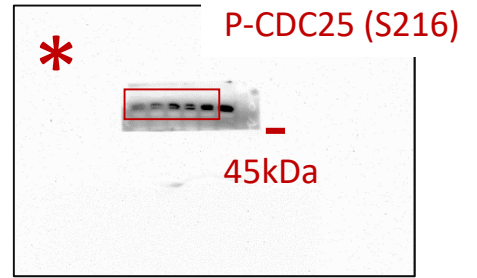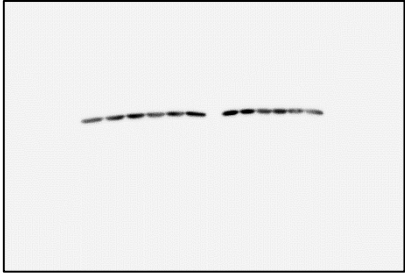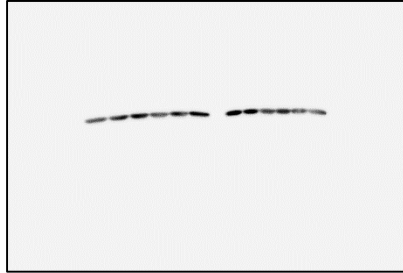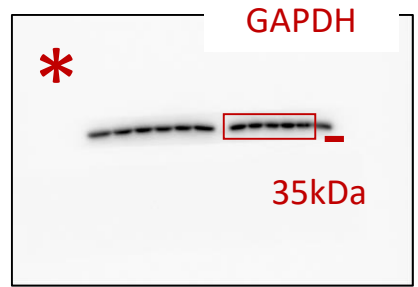

# Figure 3C – dose manners

ISAF (24 hours)

\*: Presented photo

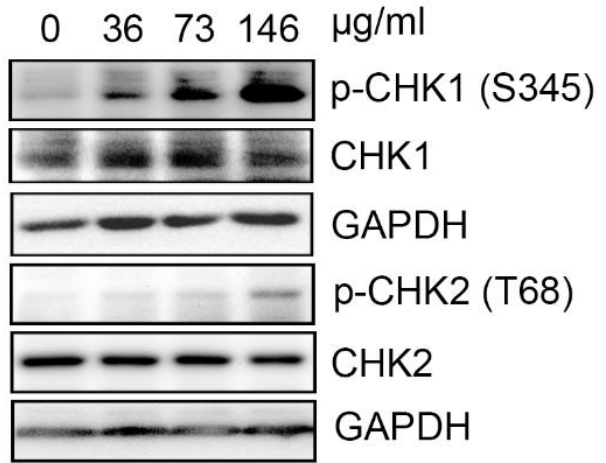

Increasing exposure time

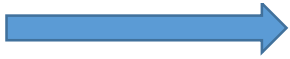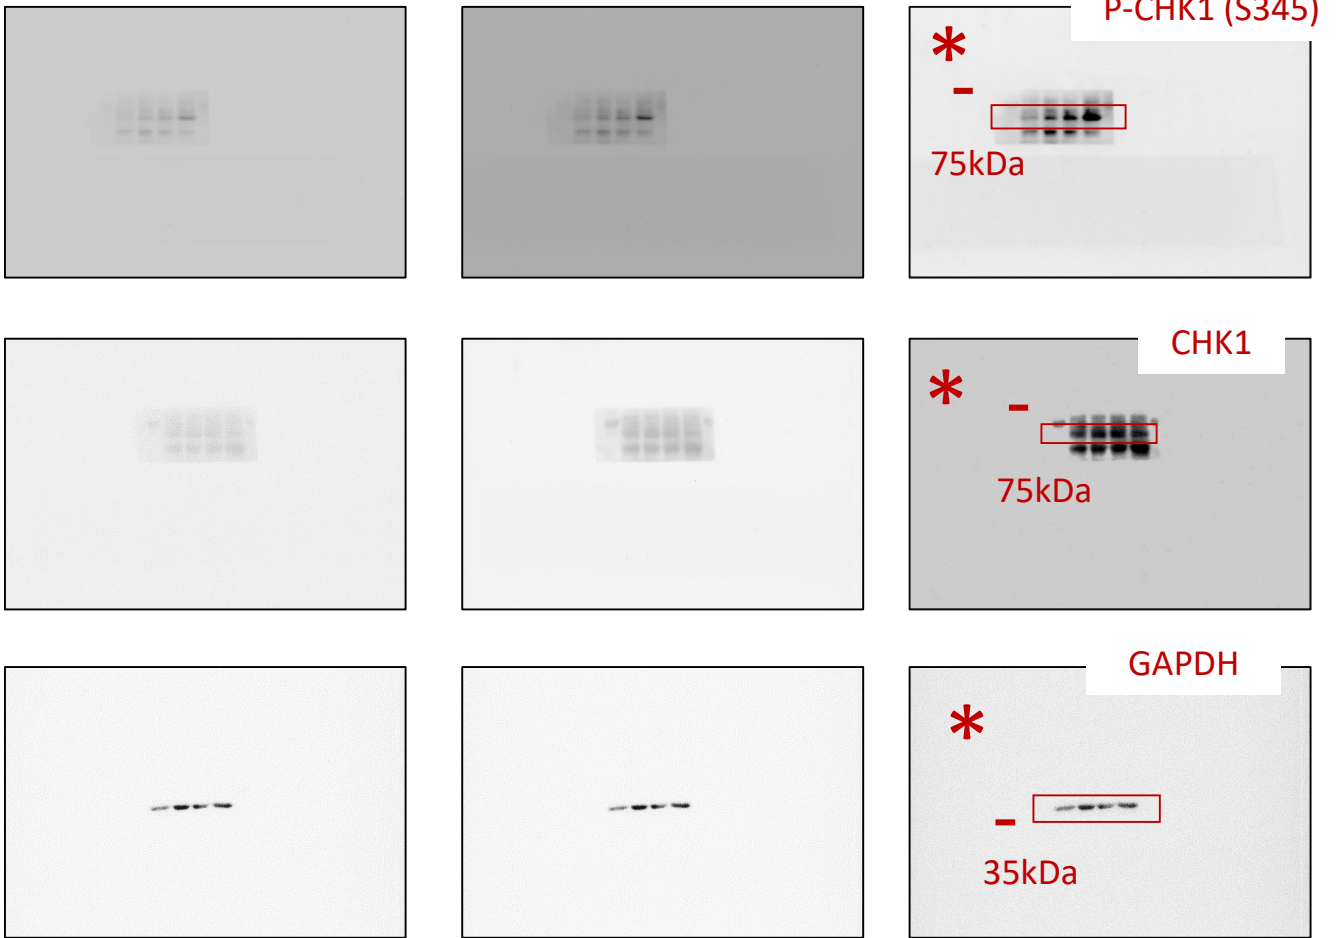

Figure 3C – dose manners

ISAF (24 hours)

\*: Presented photo

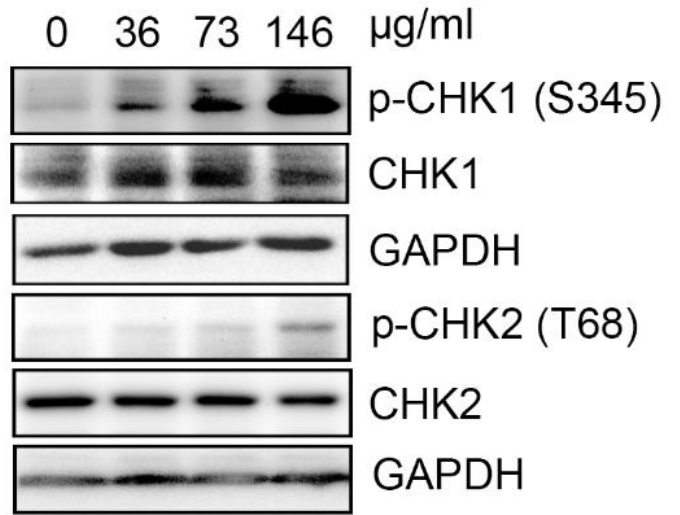

Increasing exposure time

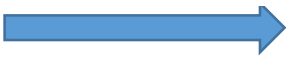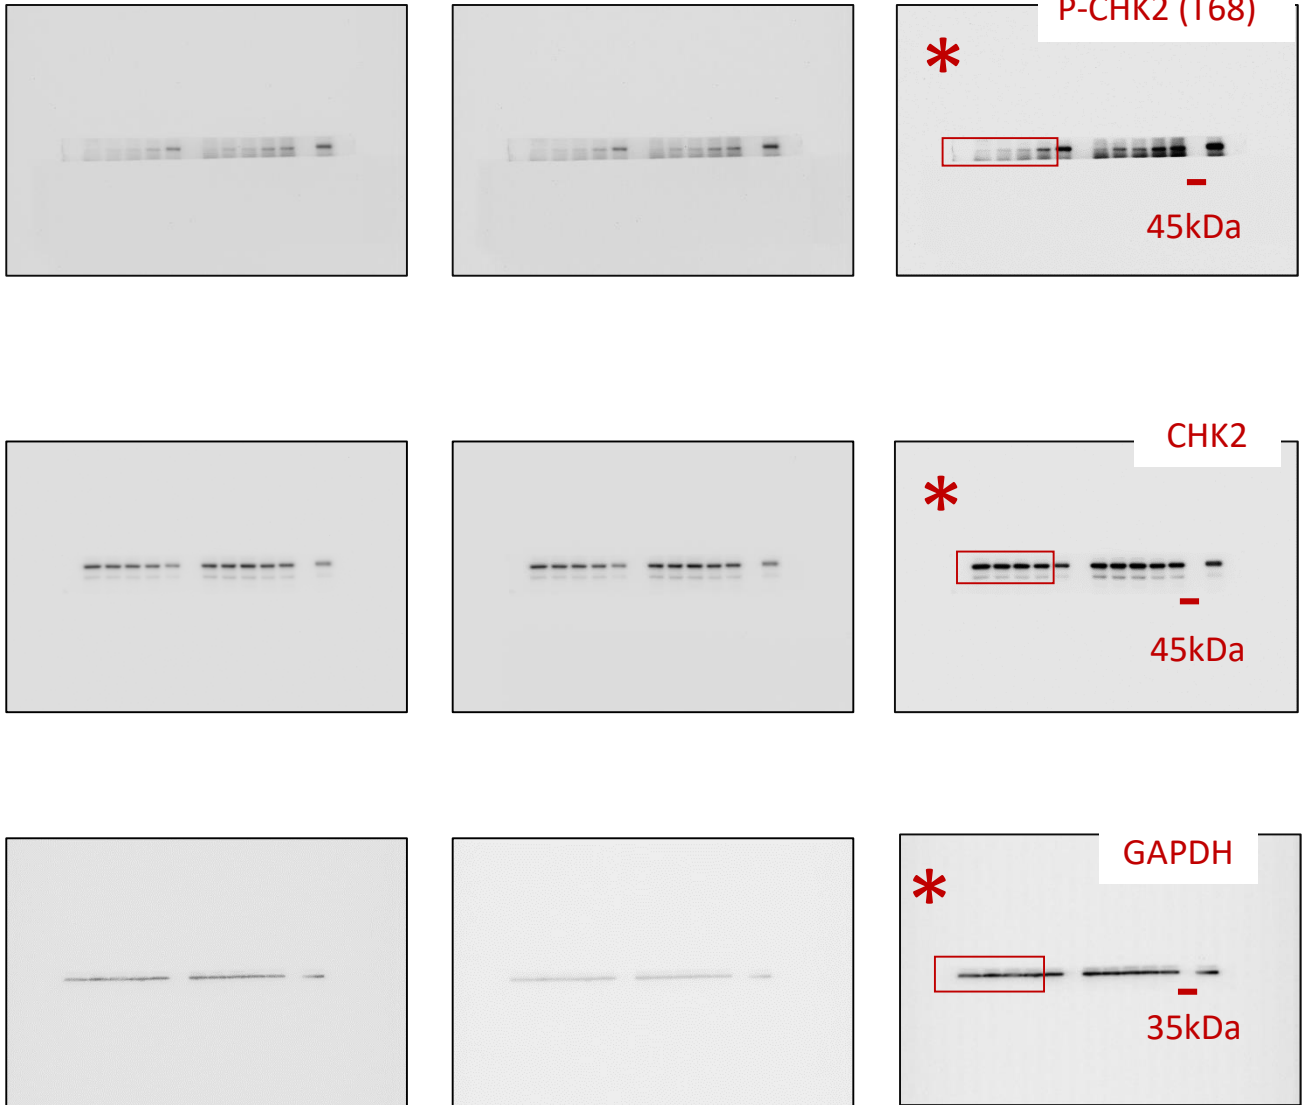

Figure 3C- time manner

ISAF (146  $\mu\text{g/ml}$ )

\*: Presented photo

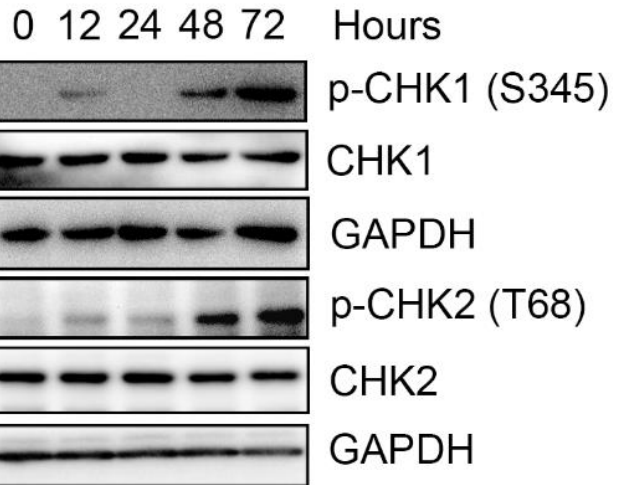

Increasing exposure time

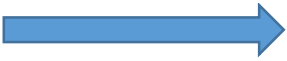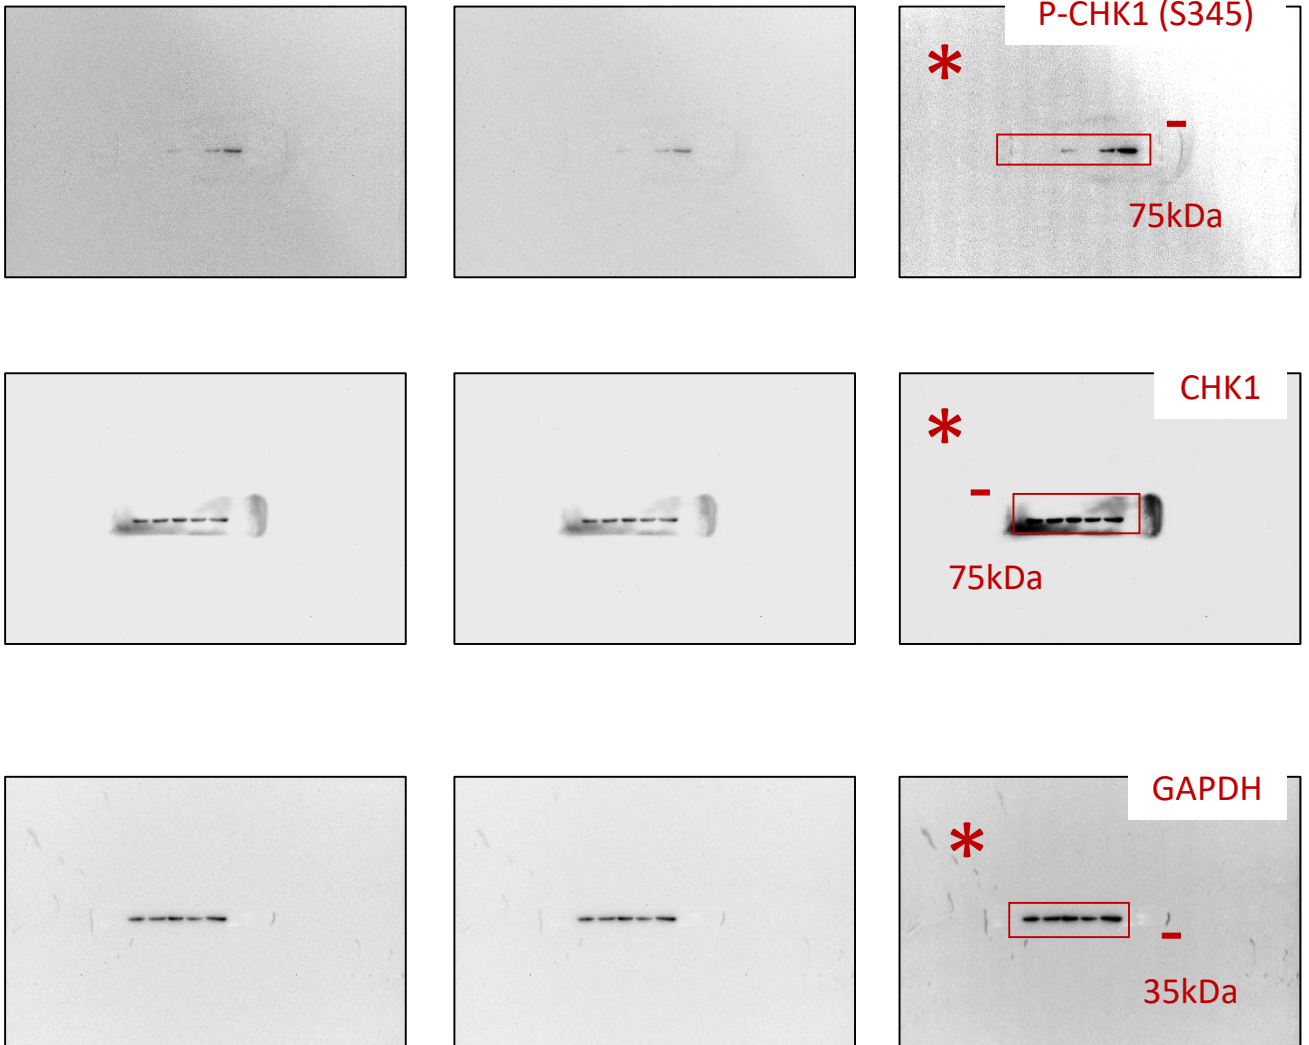

# Figure 3C – dose manner

\*: Presented photo

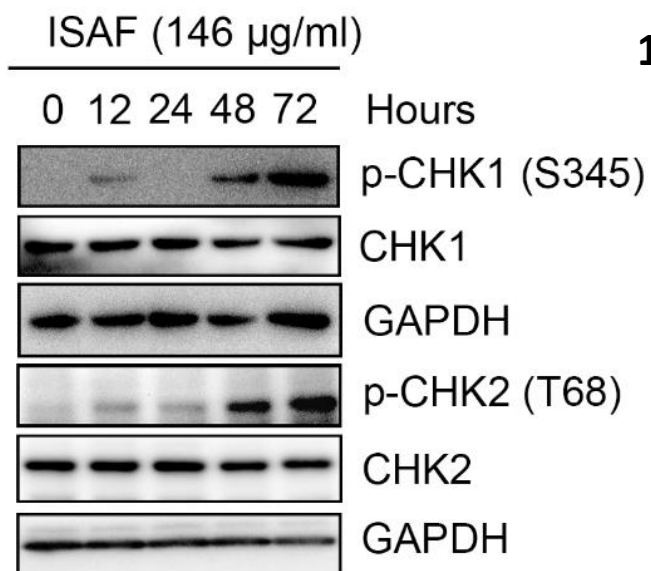

Increasing exposure time

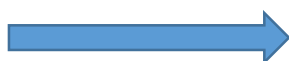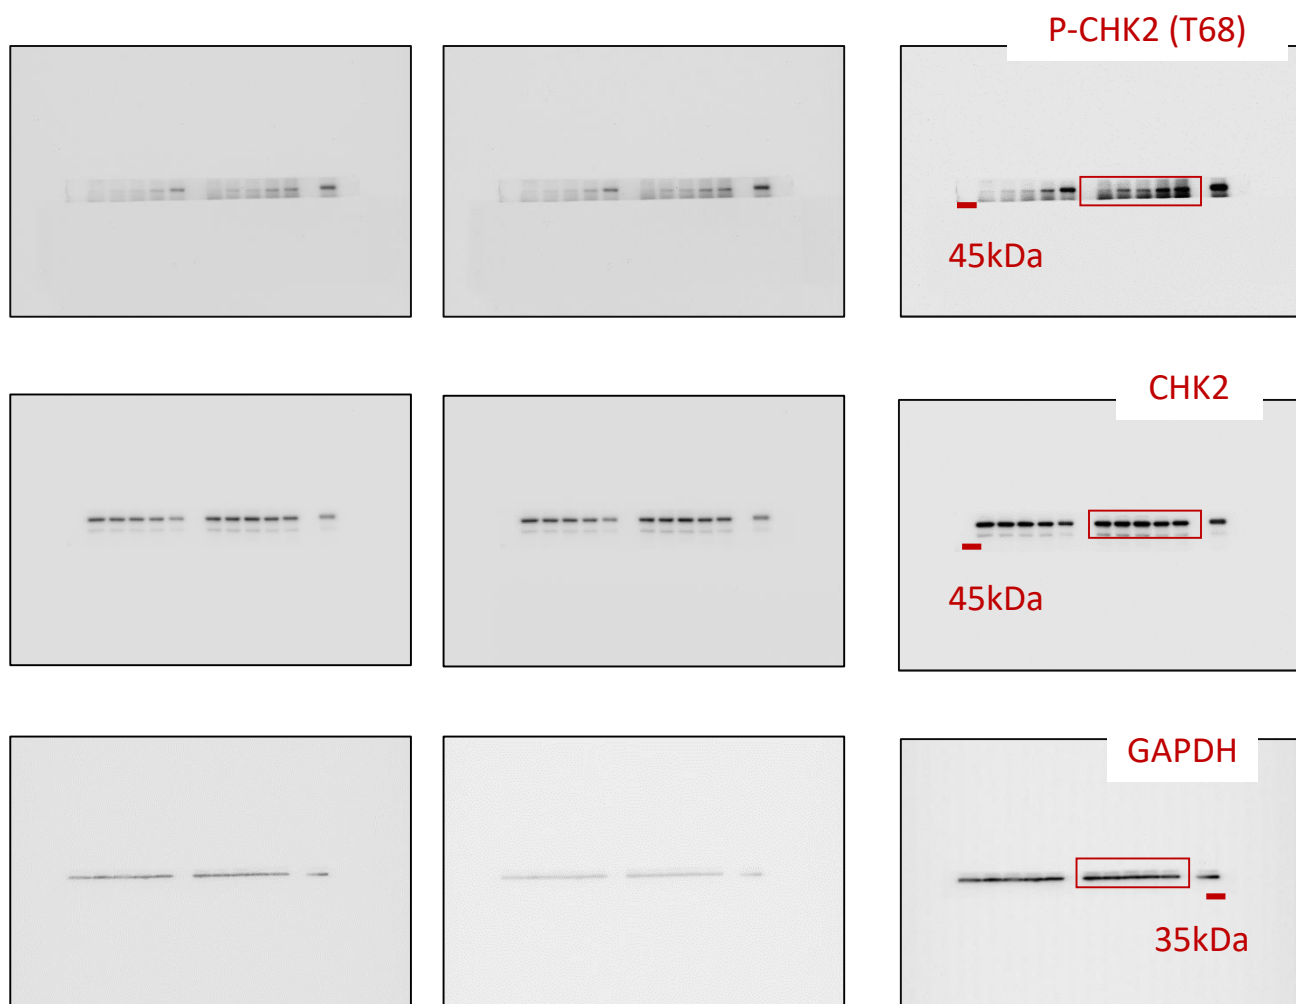

# Figure 3D – dose manner

\*: Presented photo

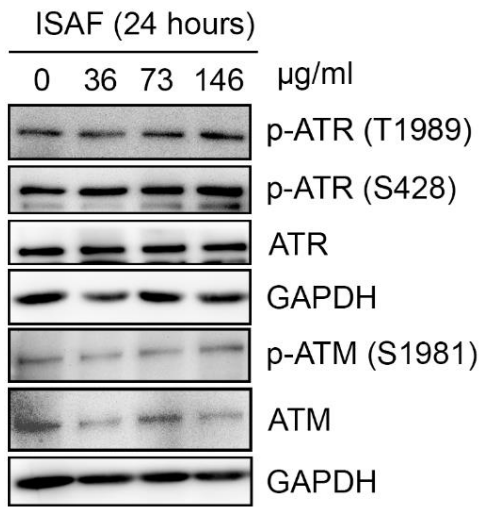

Increasing exposure time

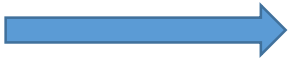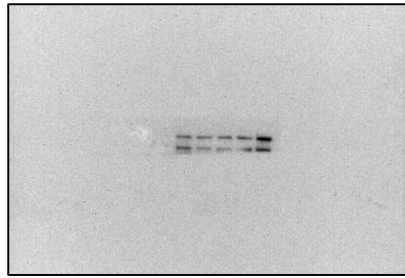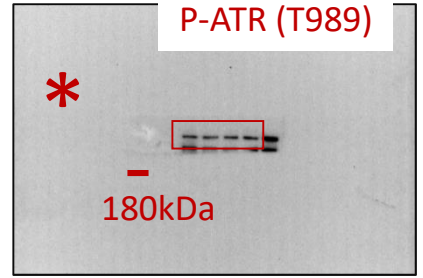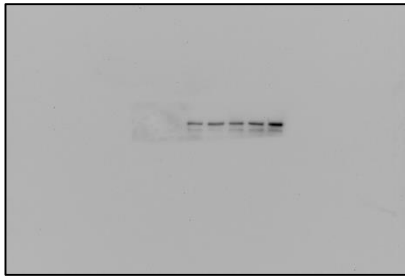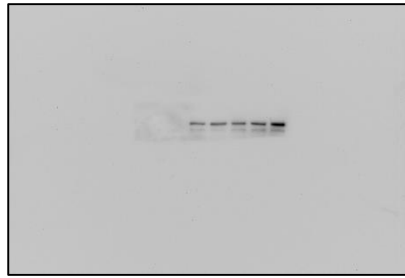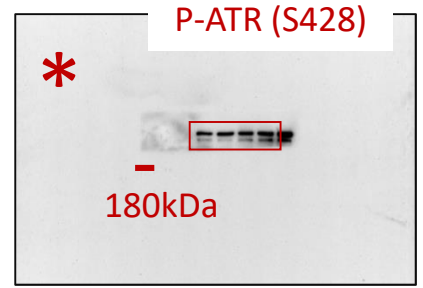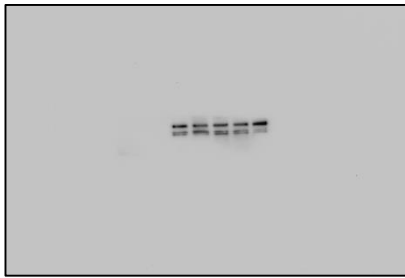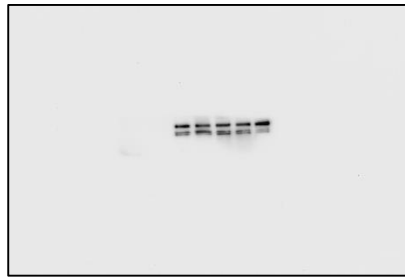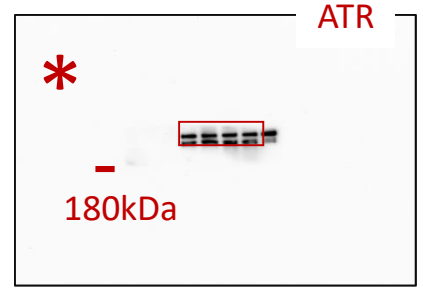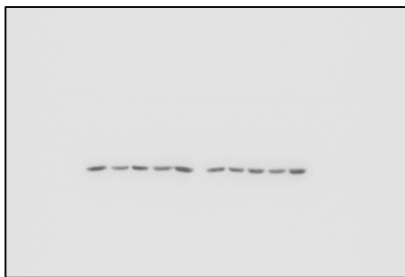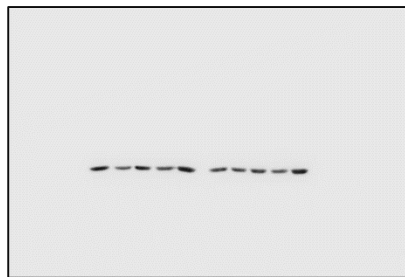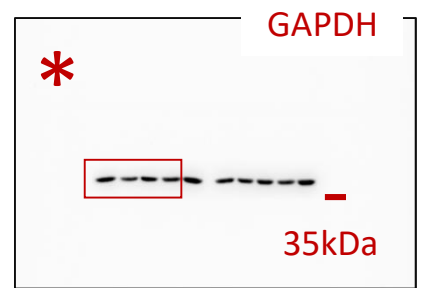

# Figure 3D – dose manner

\*: Presented photo

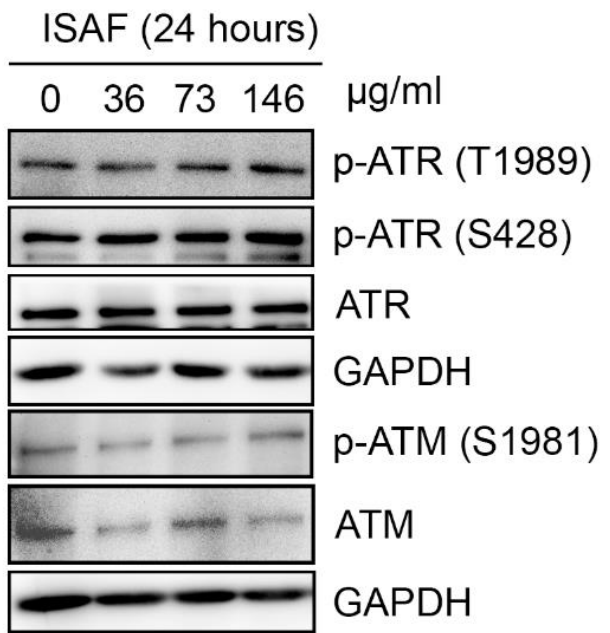

Increasing exposure time

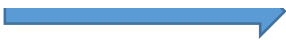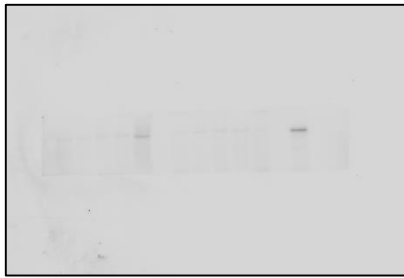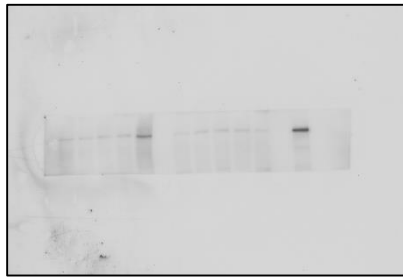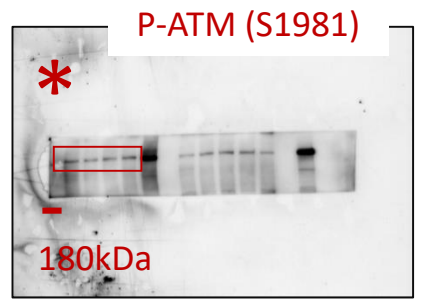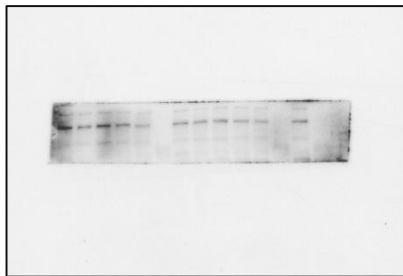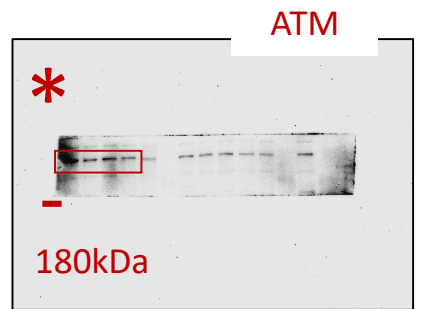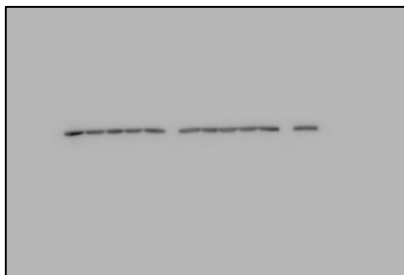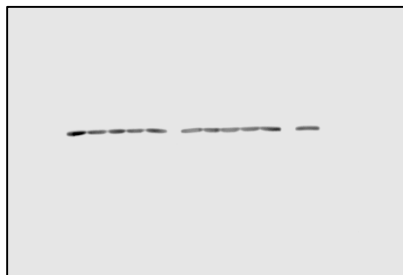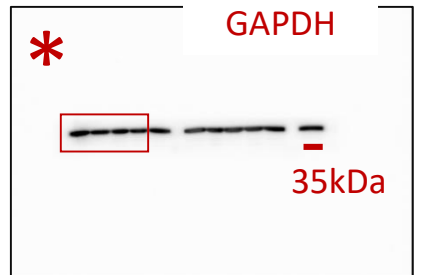



# Figure 3D – time manner

ISAF (146 µg/ml)

0 12 24 48 72 Hours

15

\*: Presented photo

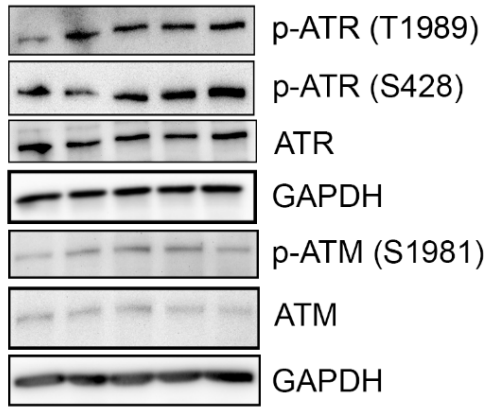

Increasing exposure time

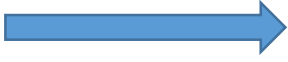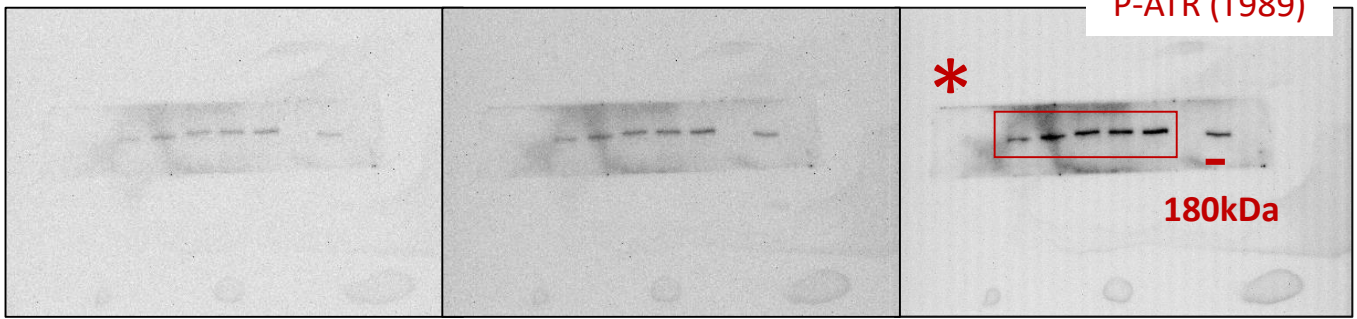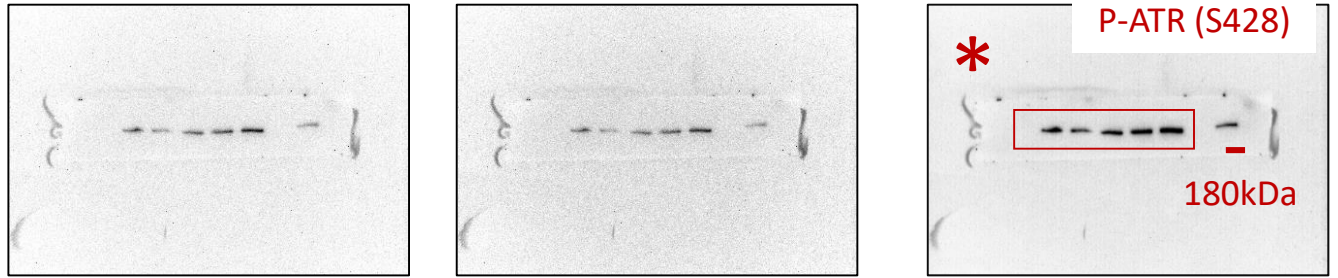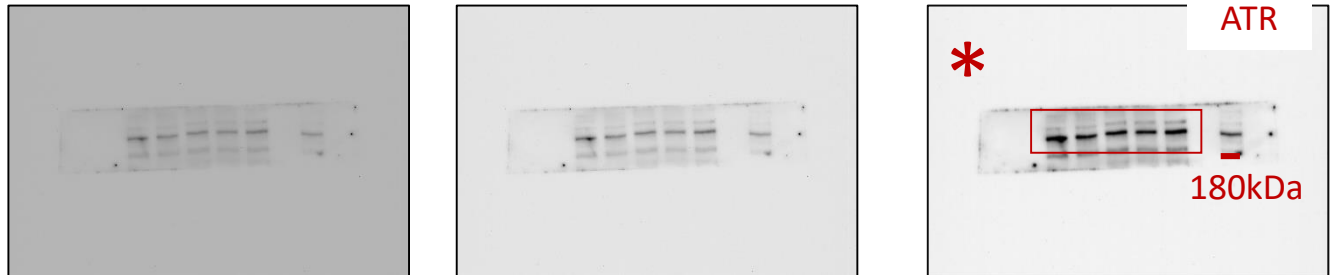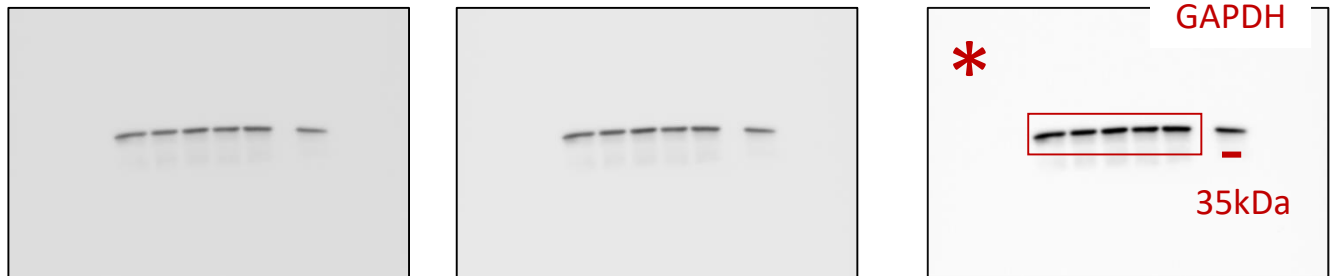

# Figure 3D – time manner

ISAF (146 µg/ml)

\*: Presented photo

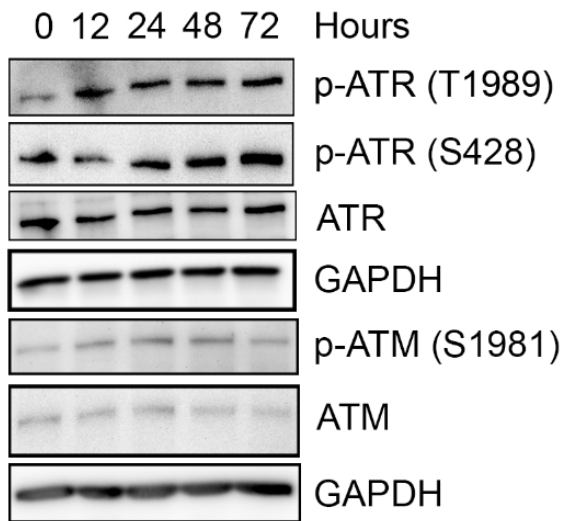

Increasing exposure time

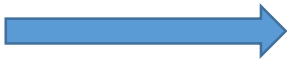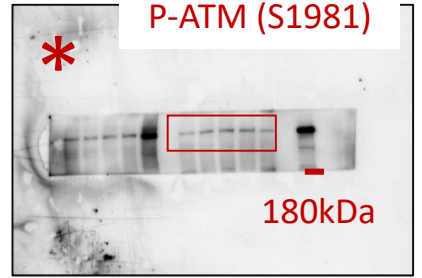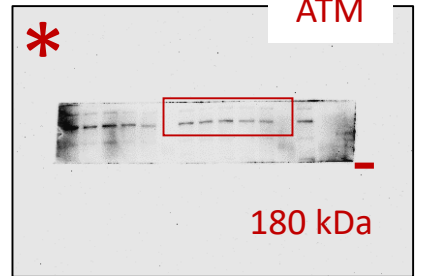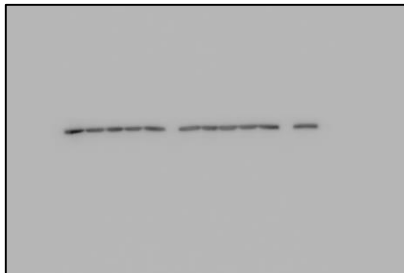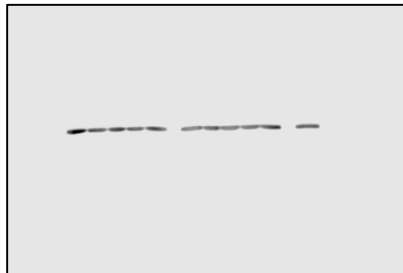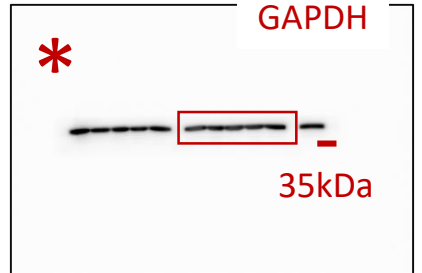

# Figure 4C

\*: Presented photo

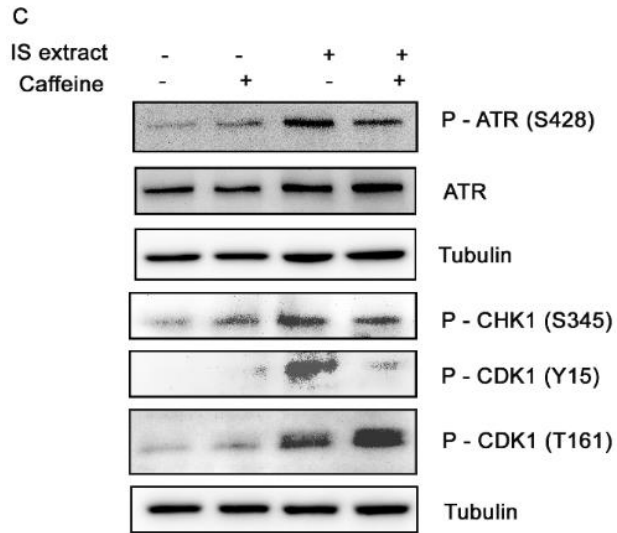

Increasing exposure time

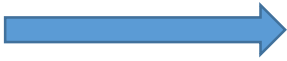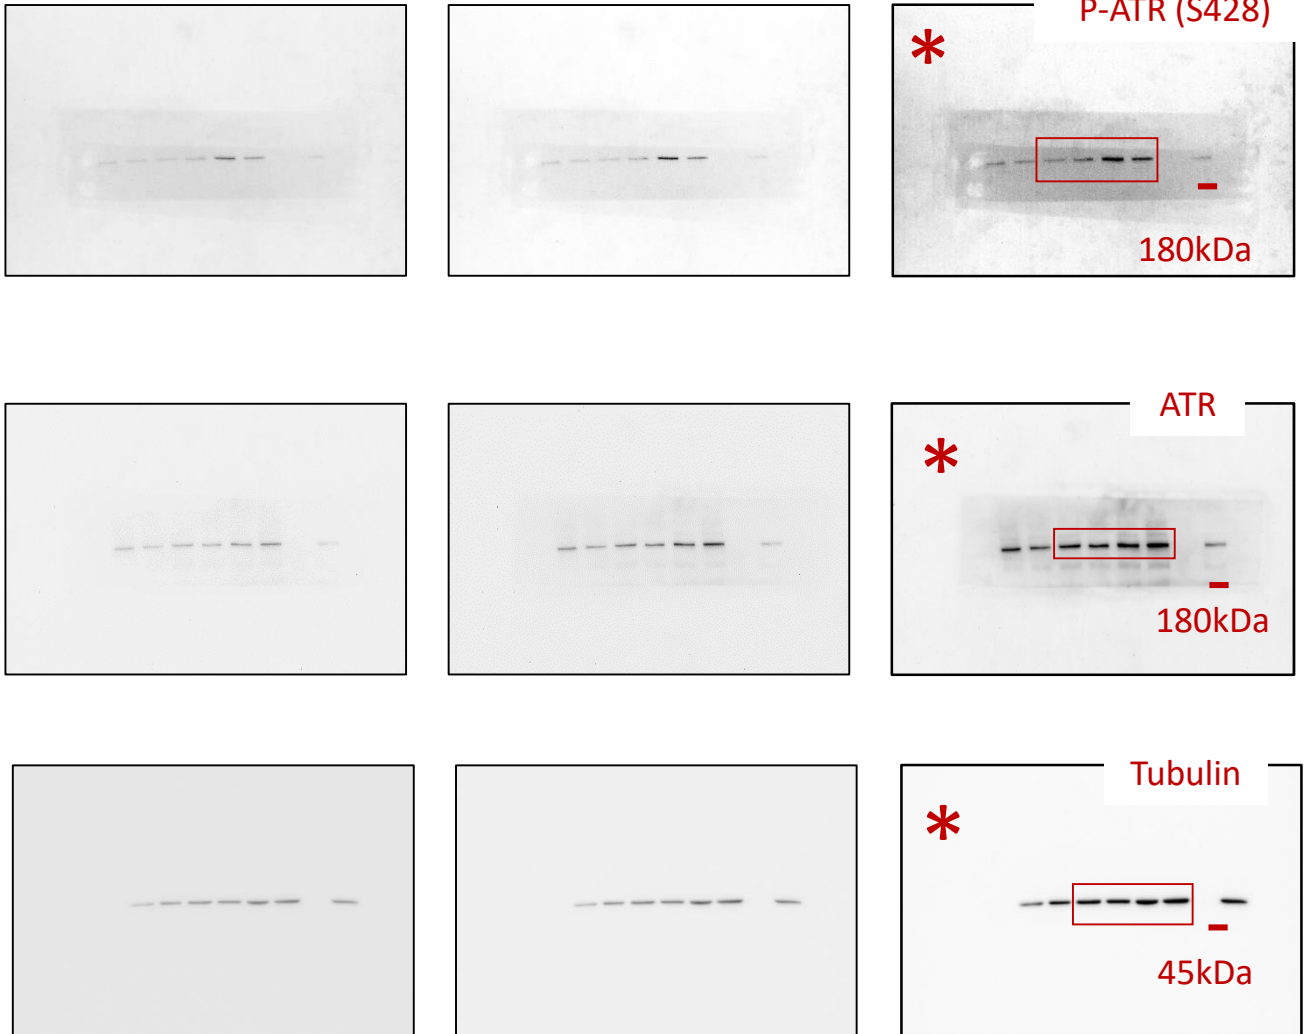

# Figure 4C

\*: Presented photo

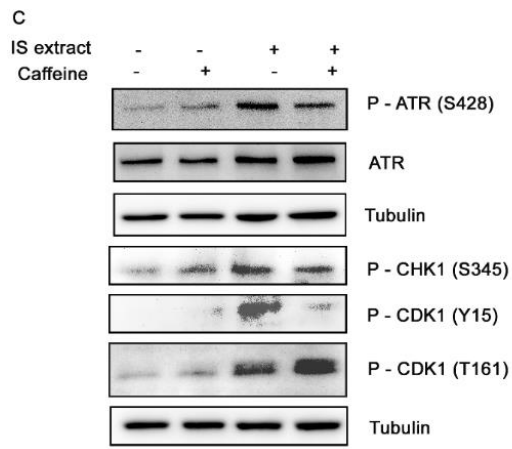

Increasing exposure time

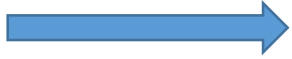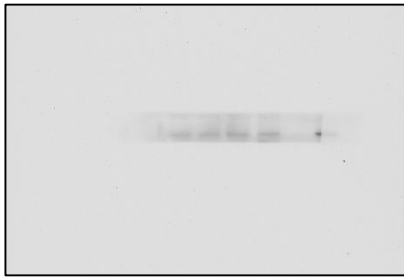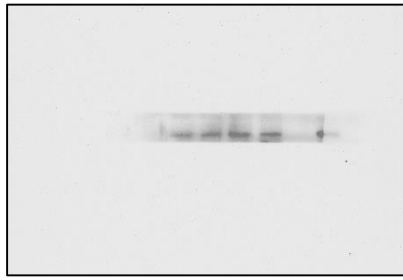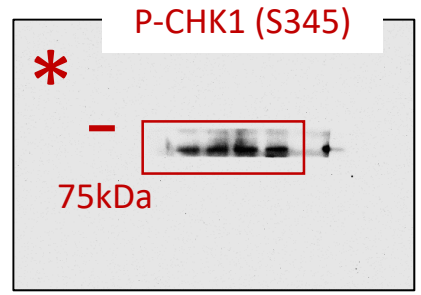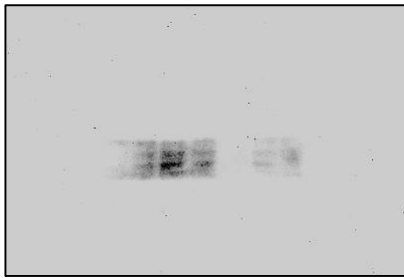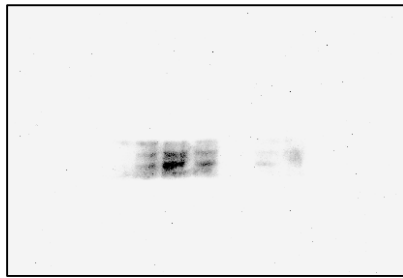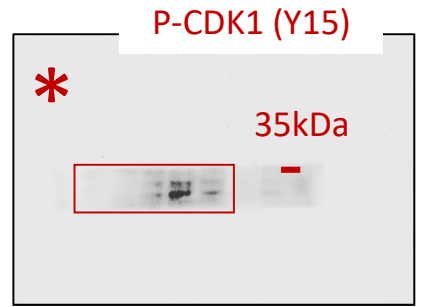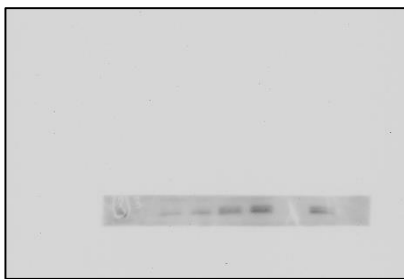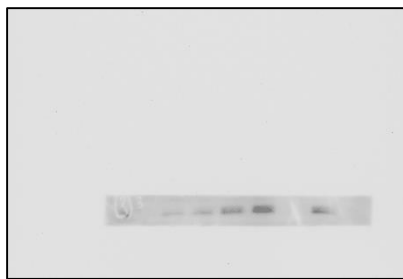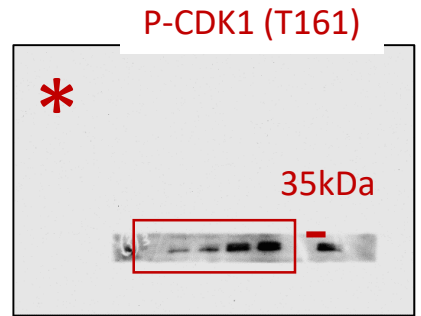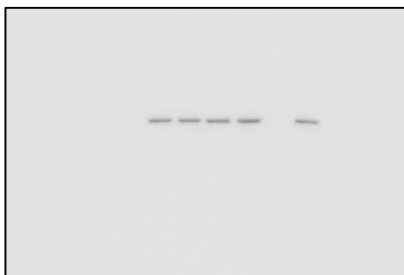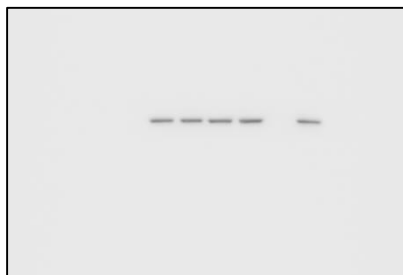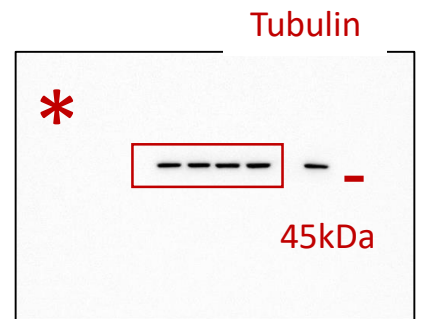

Supplement: 12906_2023_4325_MOESM1_ESM.pdf [file 12906_2023_4325_MOESM1_ESM.pdf]
